# Supplementary material for: Genome-wide identification and gene expression profiling of ubiquitin ligases for endoplasmic reticulum protein degradation
Source: PubMed Central journal article supplement (PMC4971459; doi:10.1038/srep30955), 2016-08-03
Supplement: srep30955-s1.pdf [file srep30955-s1.pdf]

# **Genome-wide identification and gene expression profiling of ubiquitin ligases for endoplasmic reticulum protein degradation**

Masayuki Kaneko, Ikuko Iwase, Yuki Yamasaki, Tomoko Takai, Yan Wu, Soshi Kanemoto, Koji Matsuhisa, Rie Asada, Yasunobu Okuma, Takeshi Watanabe, Kazunori Imaizumi, Yausyuki Nomura

## **SUPPLEMENTARY INFORMATION**

**a**

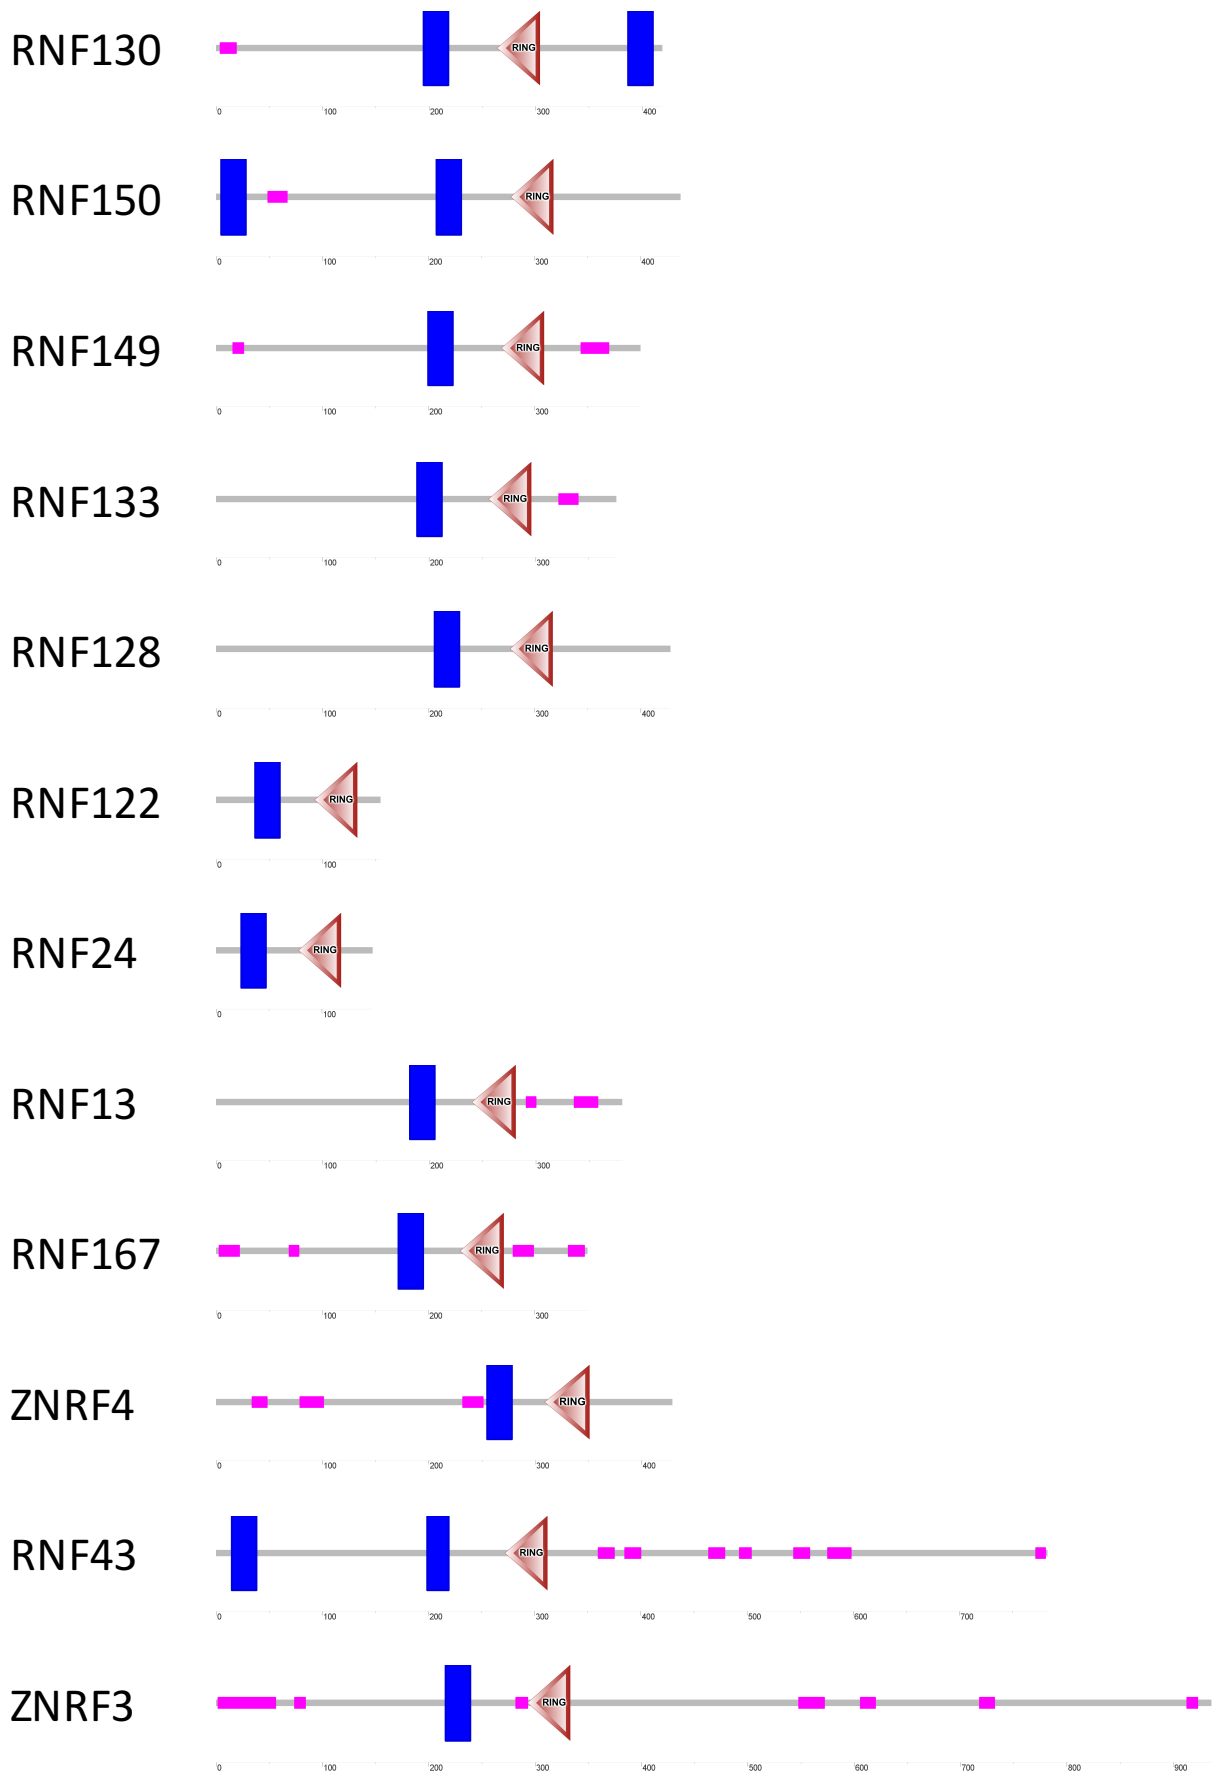

**a**

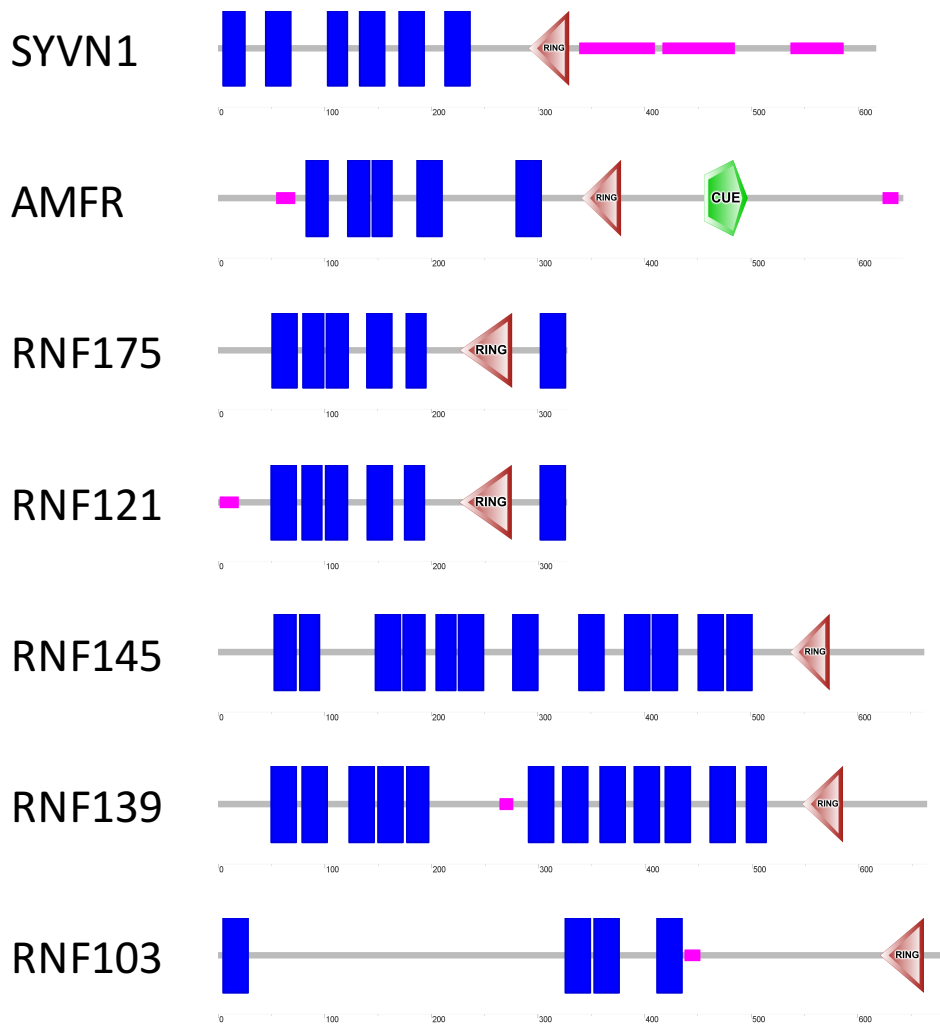

**b**

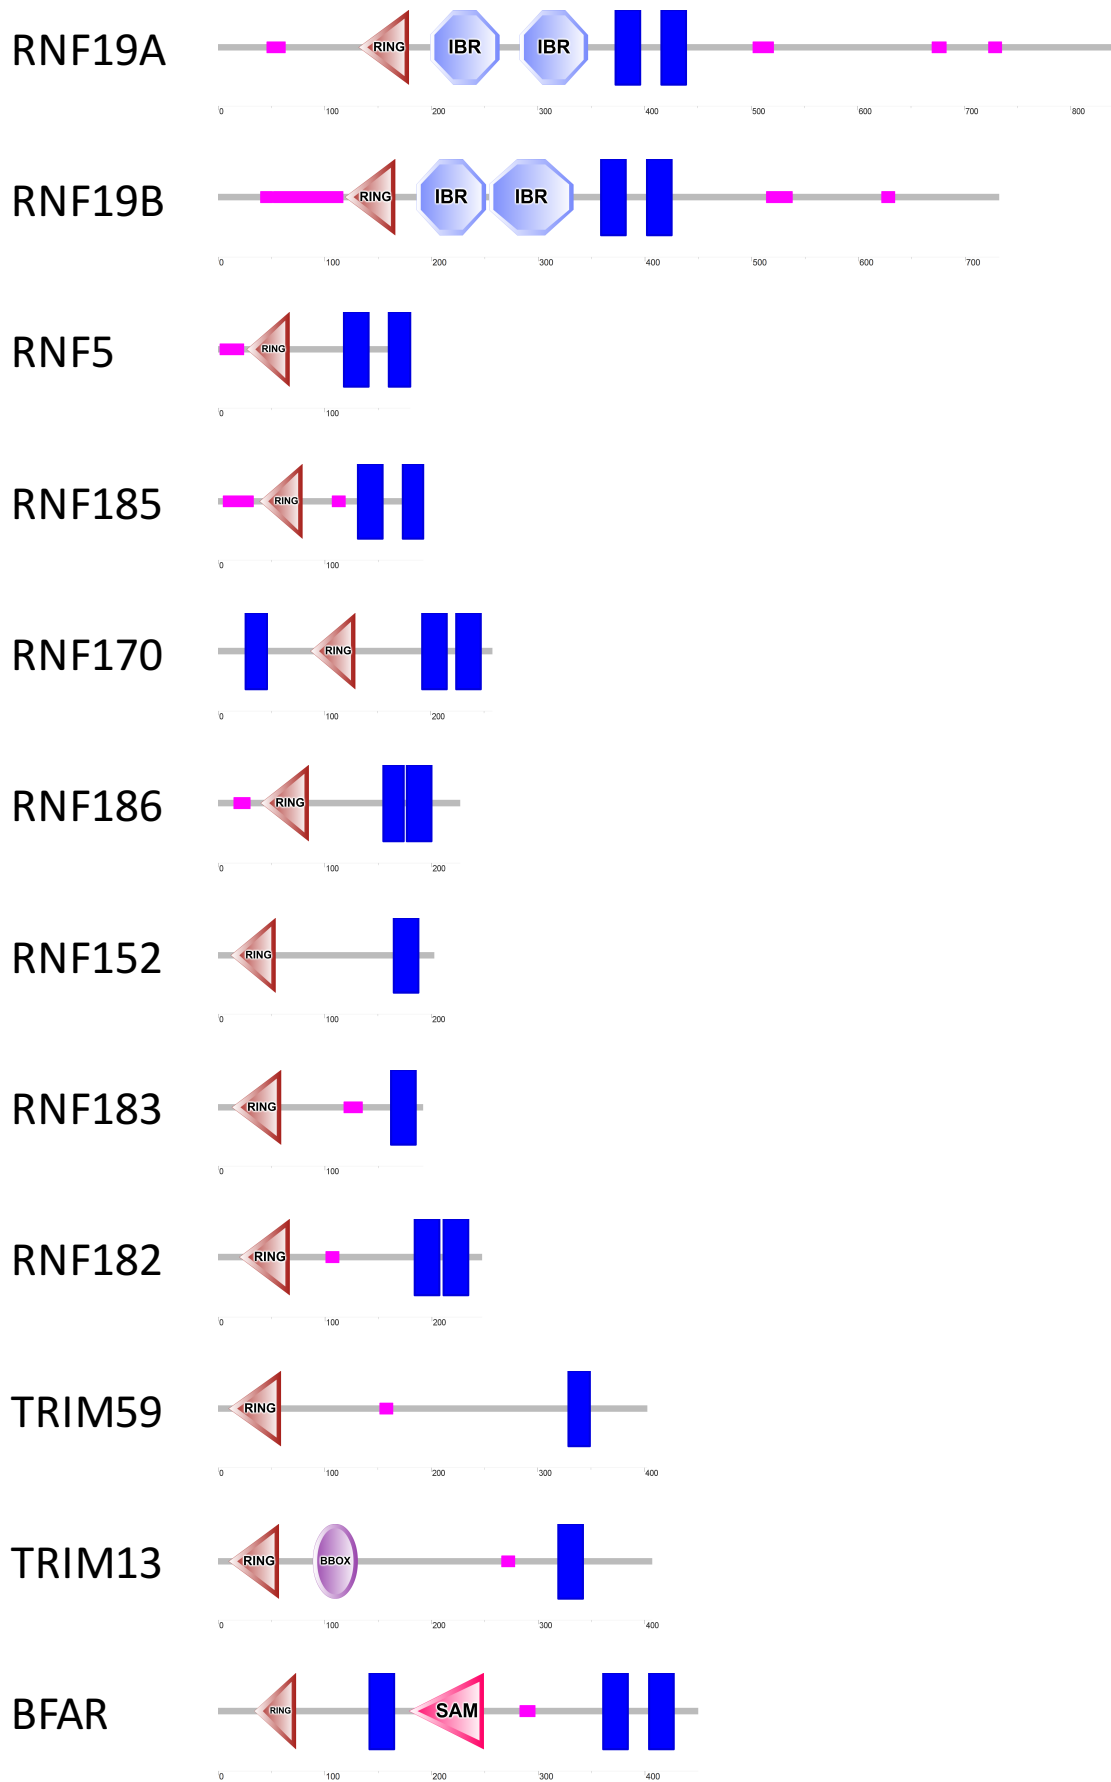

**b**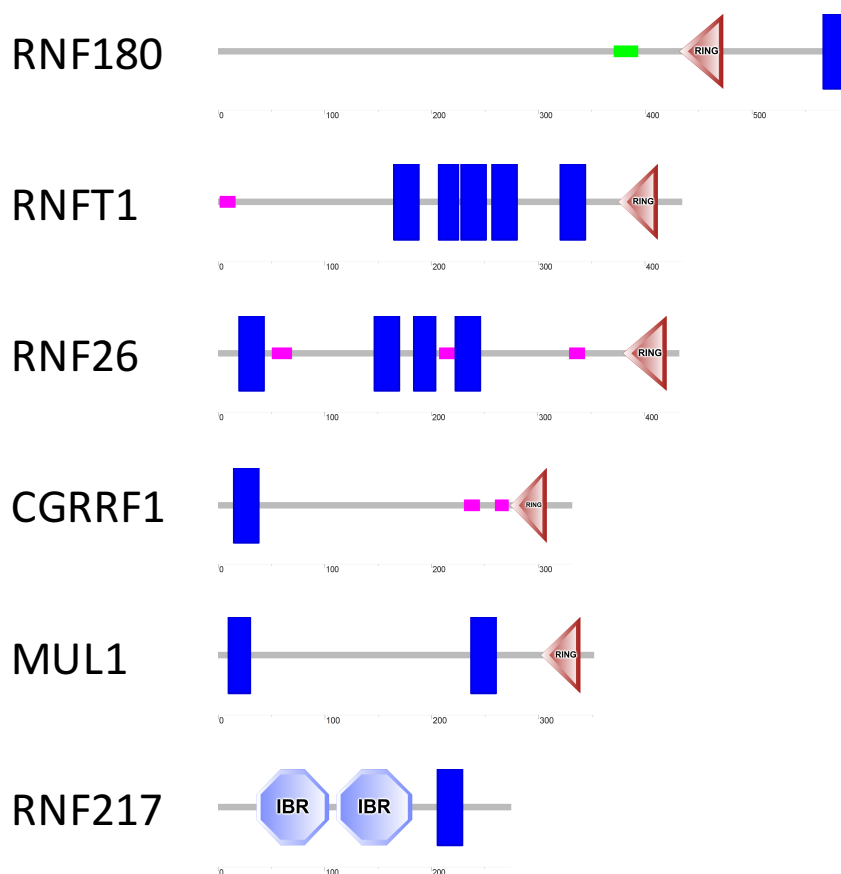

**Supplementary Fig. S1. Schematic diagrams of predicted domains for E3 ligases. (a)** C3H2C3-RING E3s. **(b)** C3HC4-RING E3s. Schematic diagrams of predicted domains for E3 ligases were made with the SMART program. The *blue* box indicates transmembrane helix region, as detected by the TMHMM v2.0 program. The *bold line in pink* represents low complexity sequence. The *red* triangle is the RING-finger domain, and the CUE domain in AMFR is an ubiquitin-binding motif. The IBR (in-between ring fingers) domain in RNF19A, RNF19B and RNF217 is often found between pairs of RING fingers and has been called the C6HC domain. The *bold line in yellowish green* in RNF180 represents a coiled-coil region.

**a** C3H2C3 type

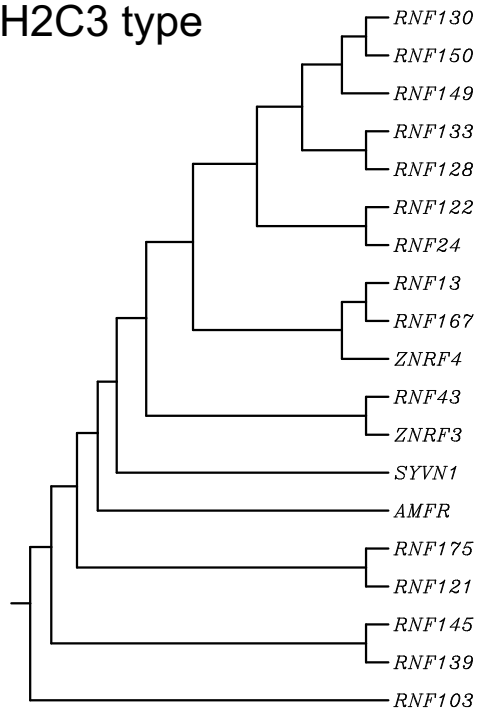

**b** C3HC4 type

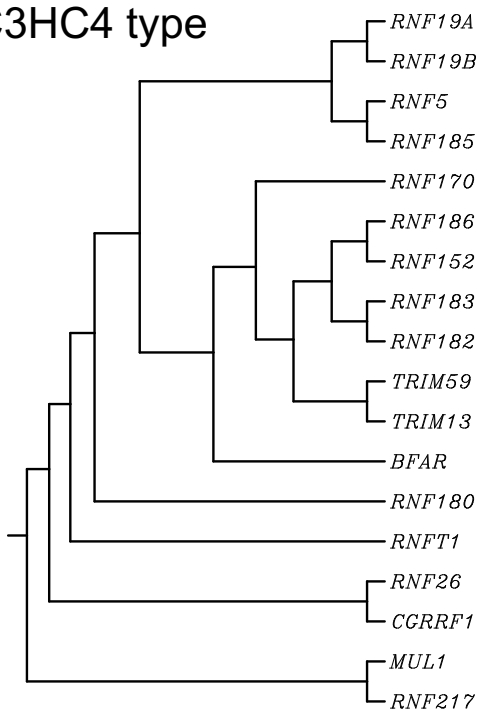

**Supplementary Fig. S2. Multiple sequence alignment for E3 ligases.** Protein sequences for E3 ligases were aligned with a multiple sequence alignment by CLUSTALW (<http://www.genome.jp/tools/clustalw/>). **(a)** C3H2C3-RING E3s. **(b)** C3HC4-RING E3s.

### a RNF130 family

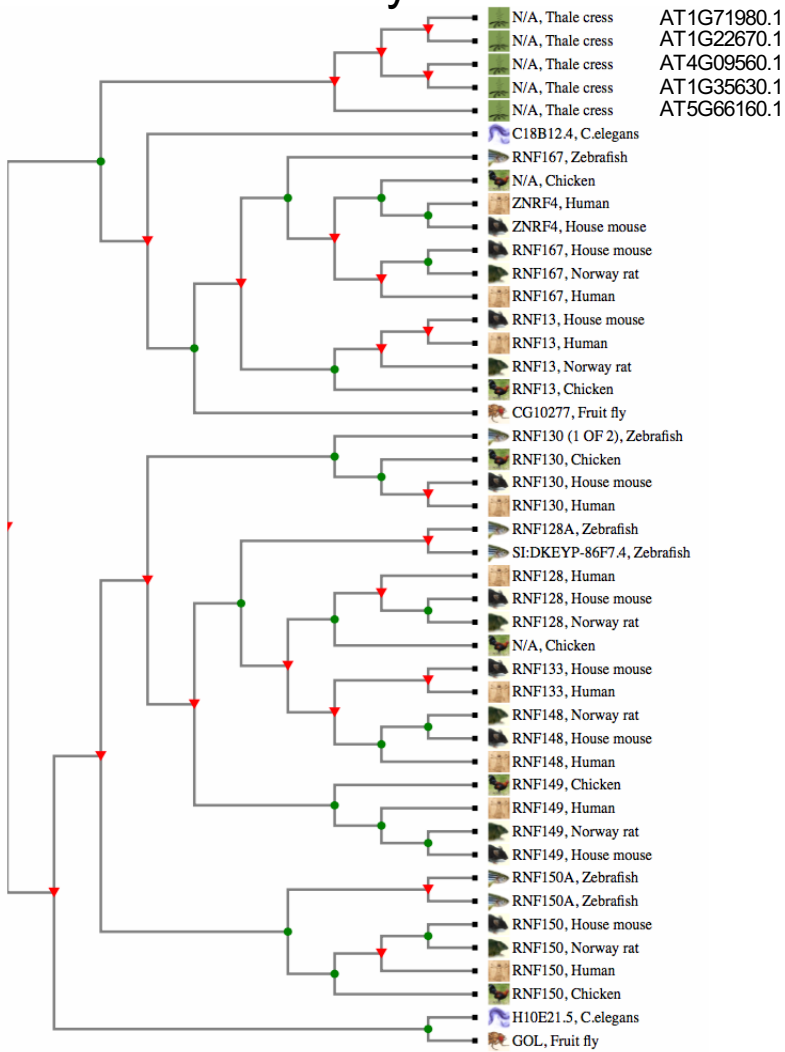

### b RNF43 family

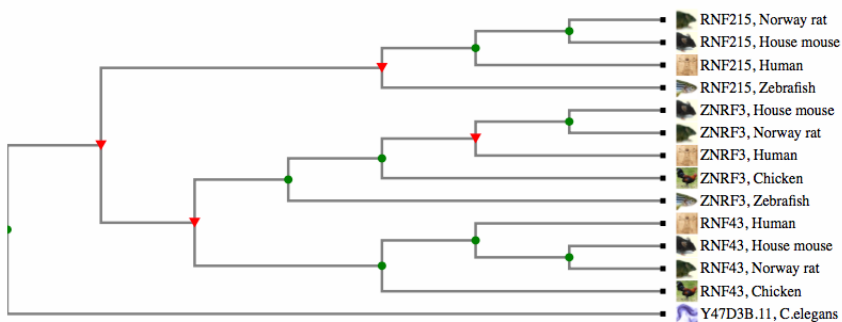

### c SYVN1 family

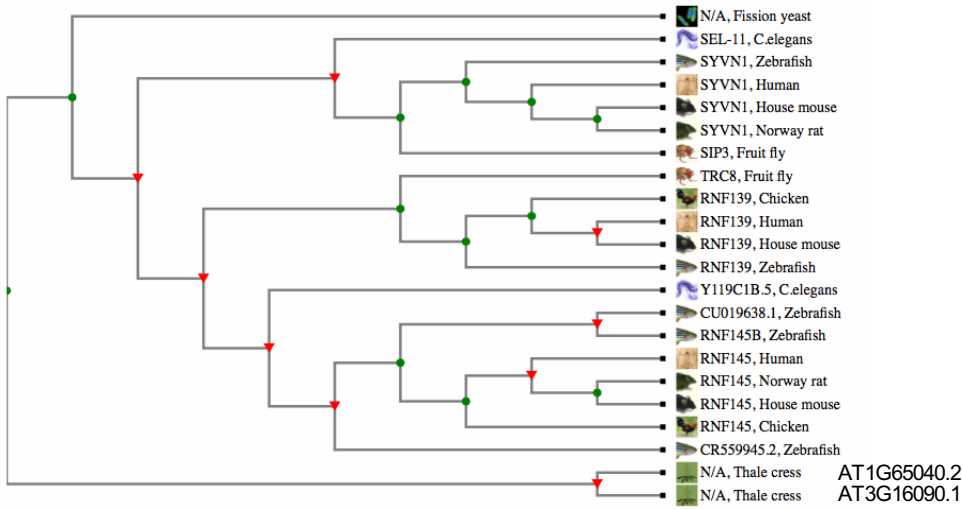

### d RNF175 family

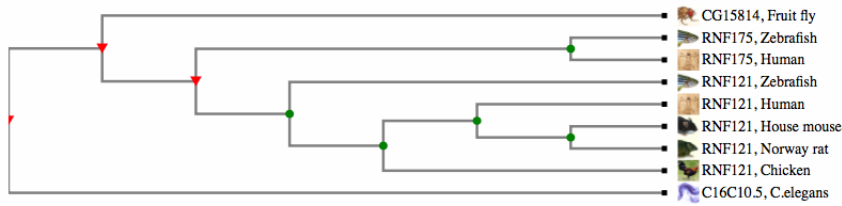



### e RNF19A family

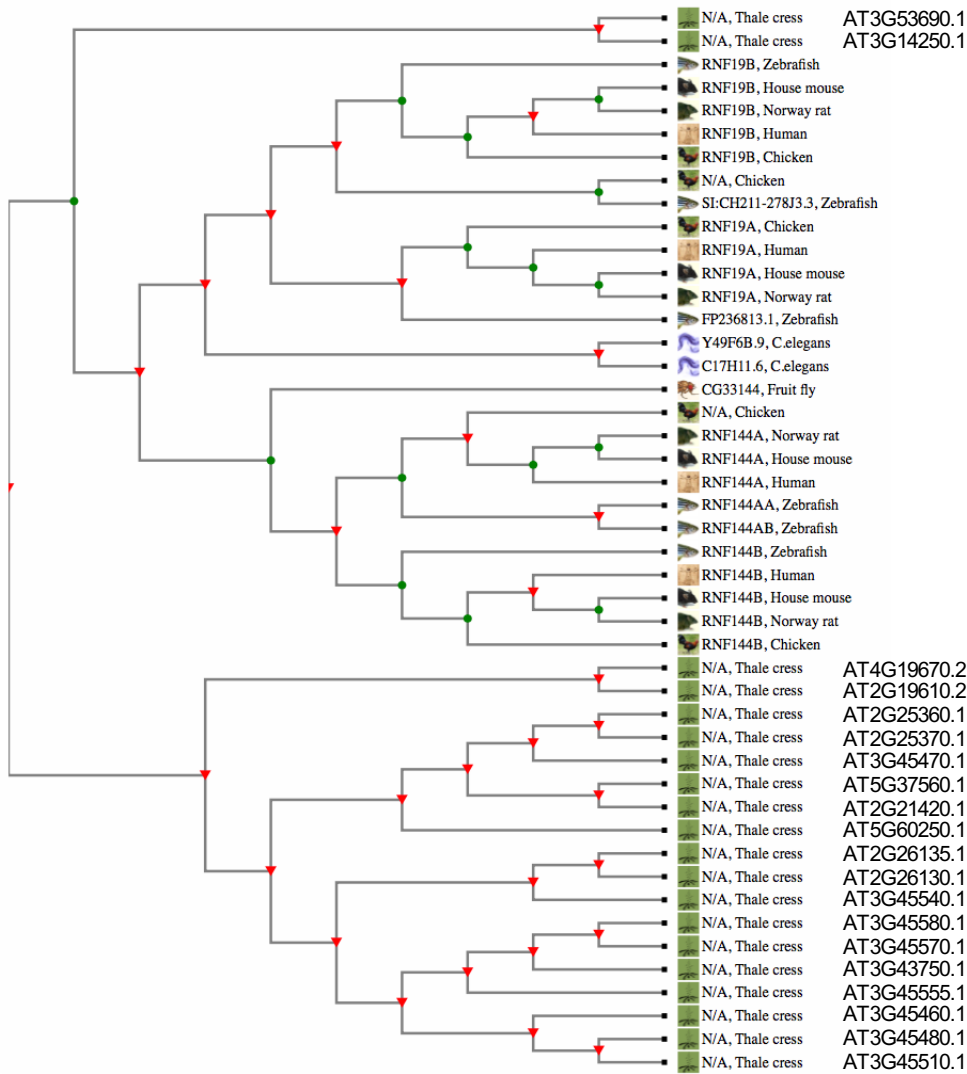

### f RNF5 family

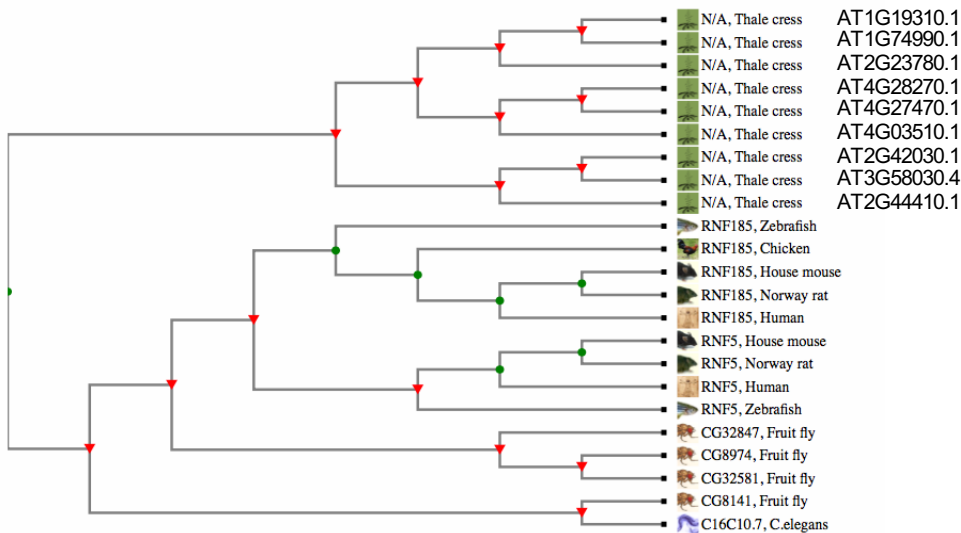

### g RNF186 family

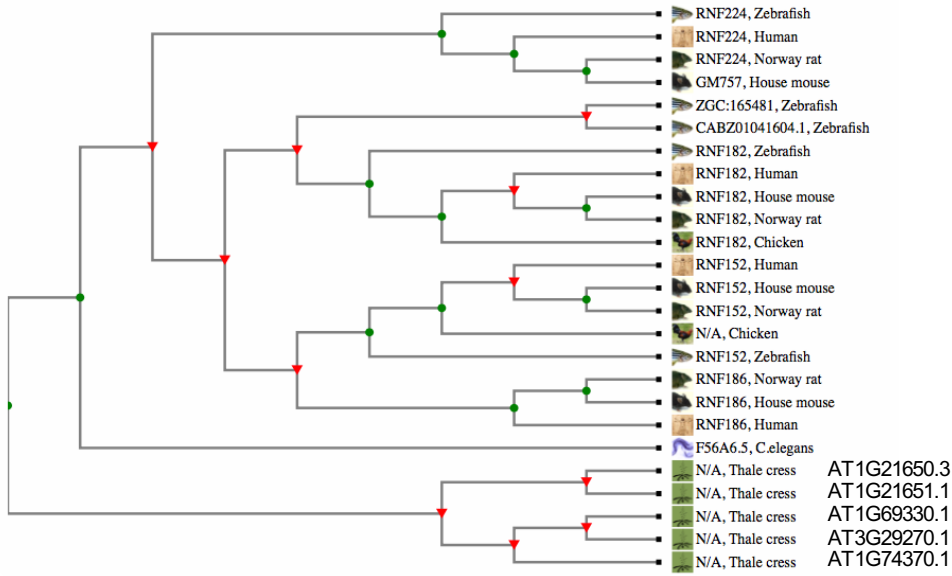

### h RNF183 family

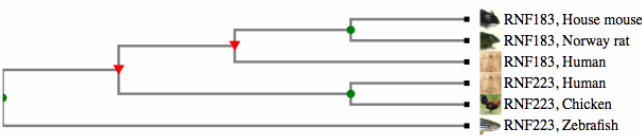

### i TRIM59 family

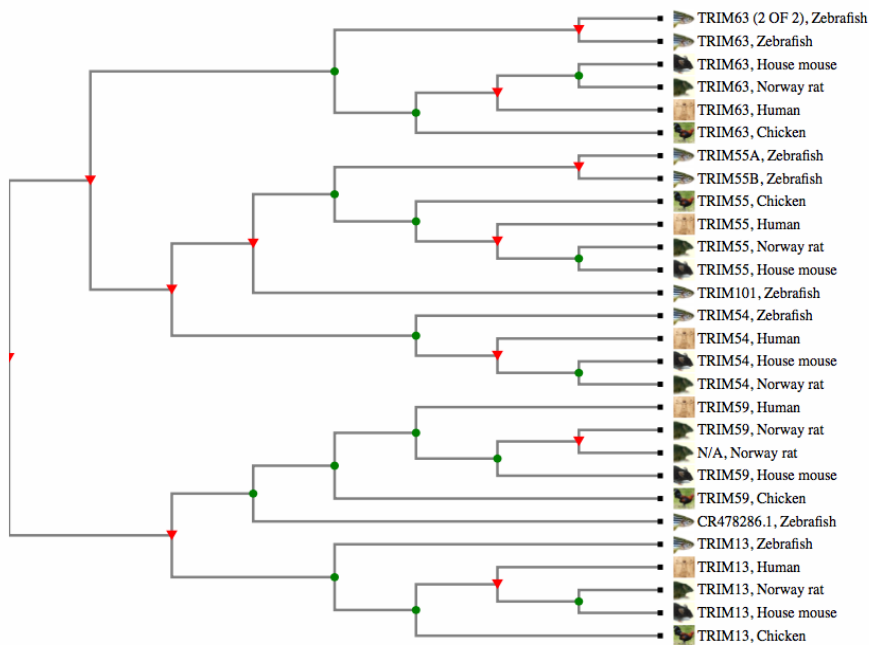

## j RNFT1 family

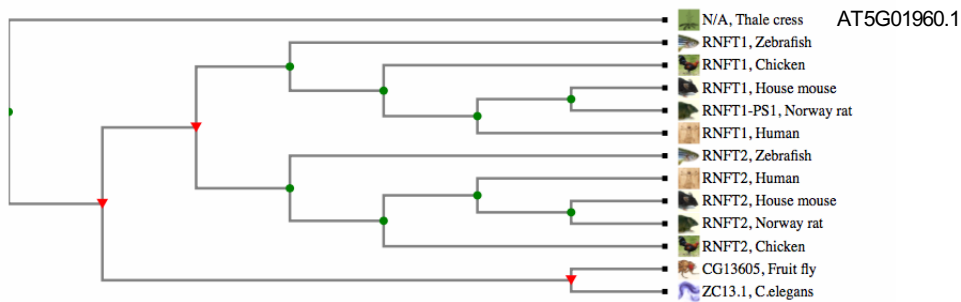

**Supplementary Fig. S3. Phylogenetic trees for E3 ligases.** Gene trees of E3 ligases were from the TreeFam data base (<http://www.treefam.org>). TreeFam automatically provides phylogenetic trees for model animal gene families as well as orthologue and paralogue assignments (for more detail, see <http://www.treefam.org/help#tabview=tab1>). Sequences were aligned using M-Coffee, and TreeBest<sup>1</sup> was used to build a gene tree and reconcile it with the species tree. TreeBest builds five source trees using nj and Phyml<sup>2</sup>, and then merges them into one tree while attempting to minimise the number of duplications using a species tree. N/A (not applicable) indicates no gene name but it exists in the species with accession numbers for reference.

## SUPPLEMENTARY REFERENCES

- 1 Ruan, J. *et al.* TreeFam: 2008 Update. *Nucleic Acids Res* **36**, D735-740 (2008).
- 2 Guindon, S. *et al.* New algorithms and methods to estimate maximum-likelihood phylogenies: assessing the performance of PhyML 3.0. *Syst Biol* **59**, 307-321 (2010).

**a**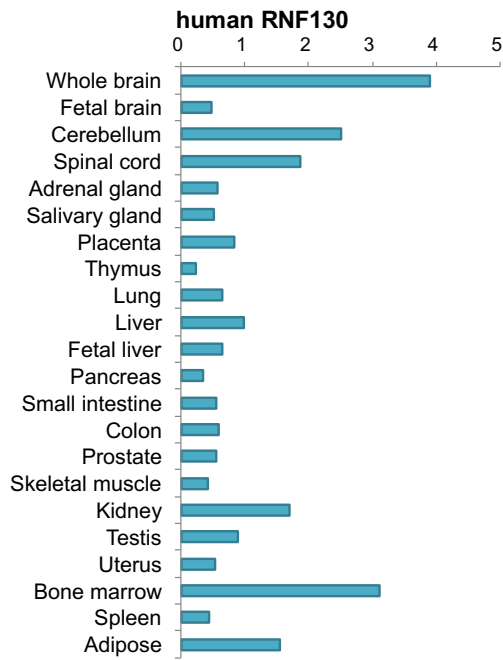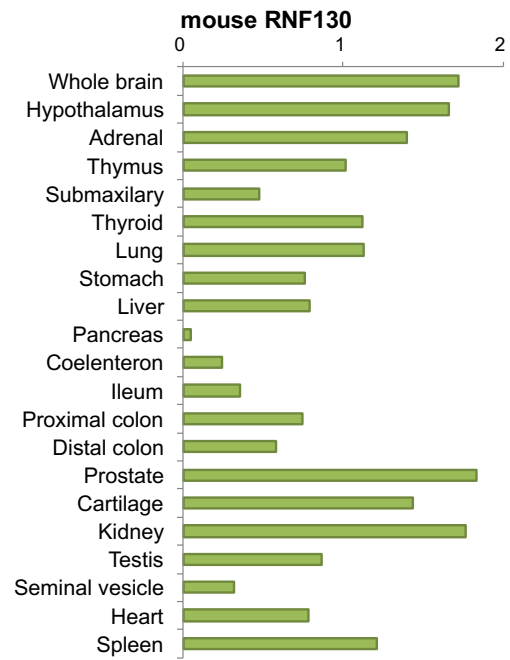**b**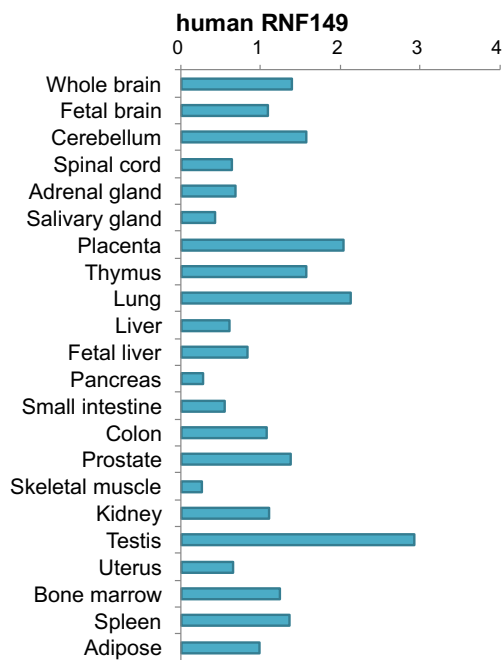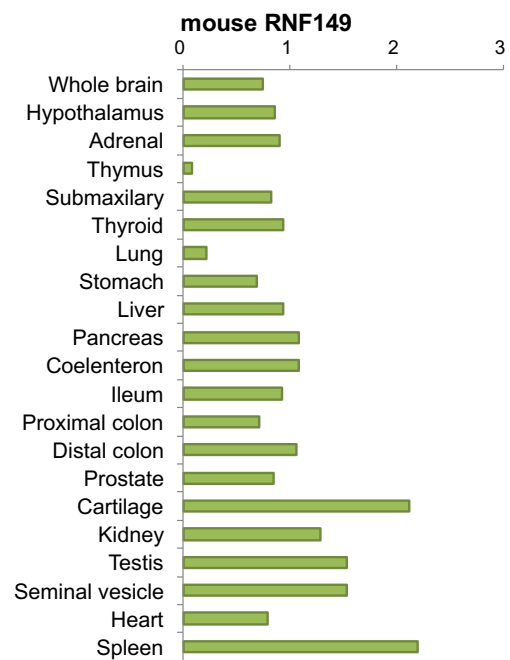

**c**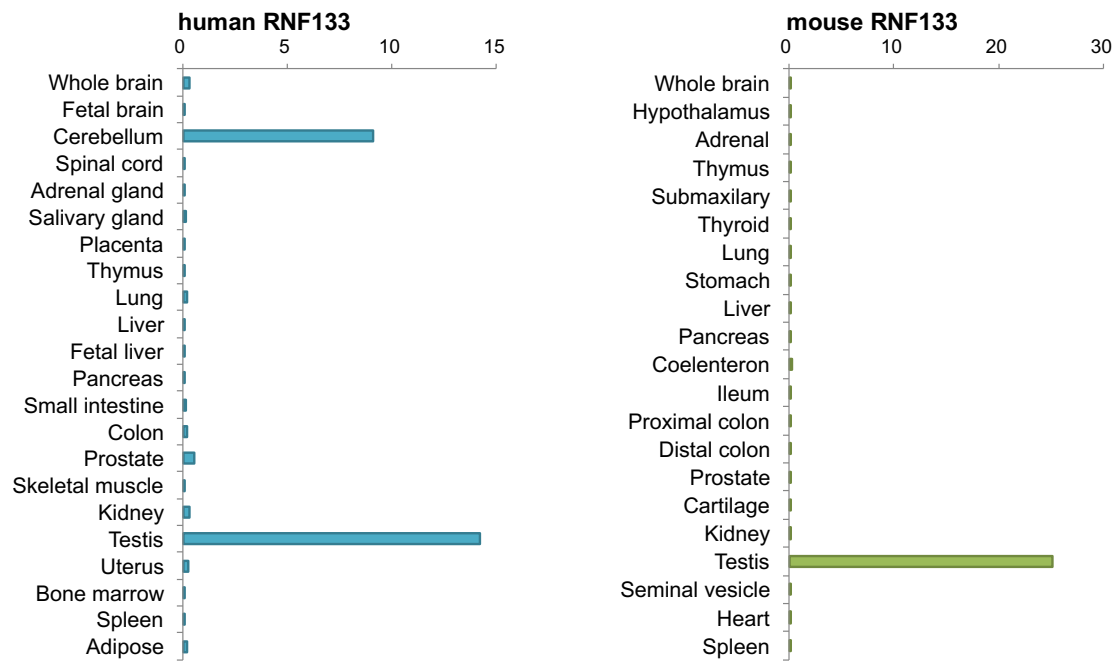**d**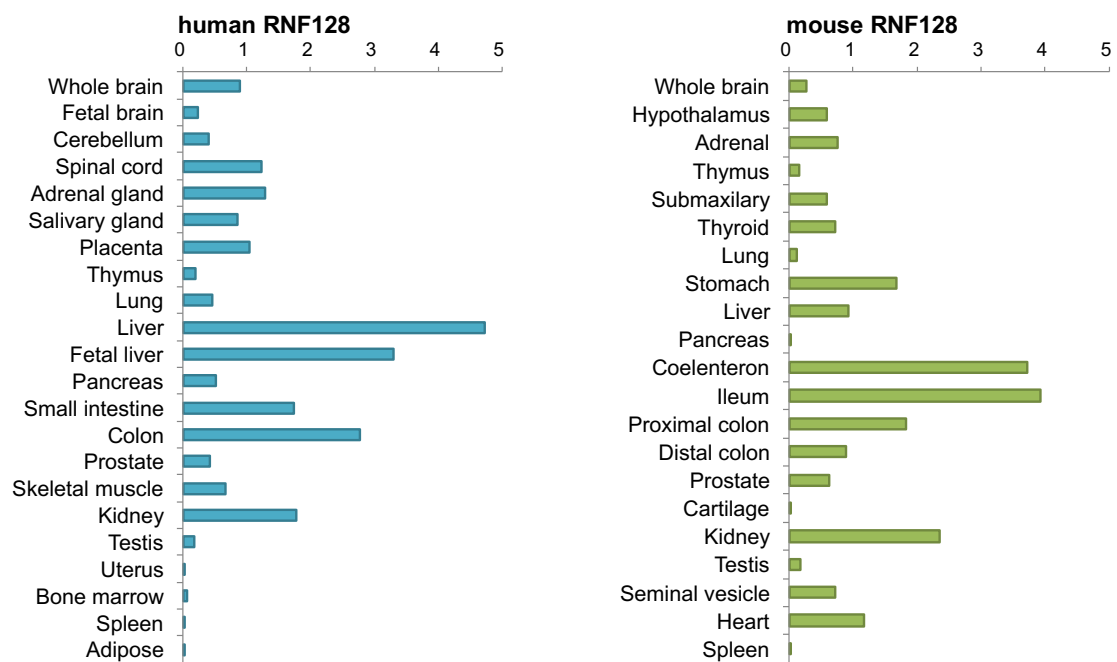

**e**

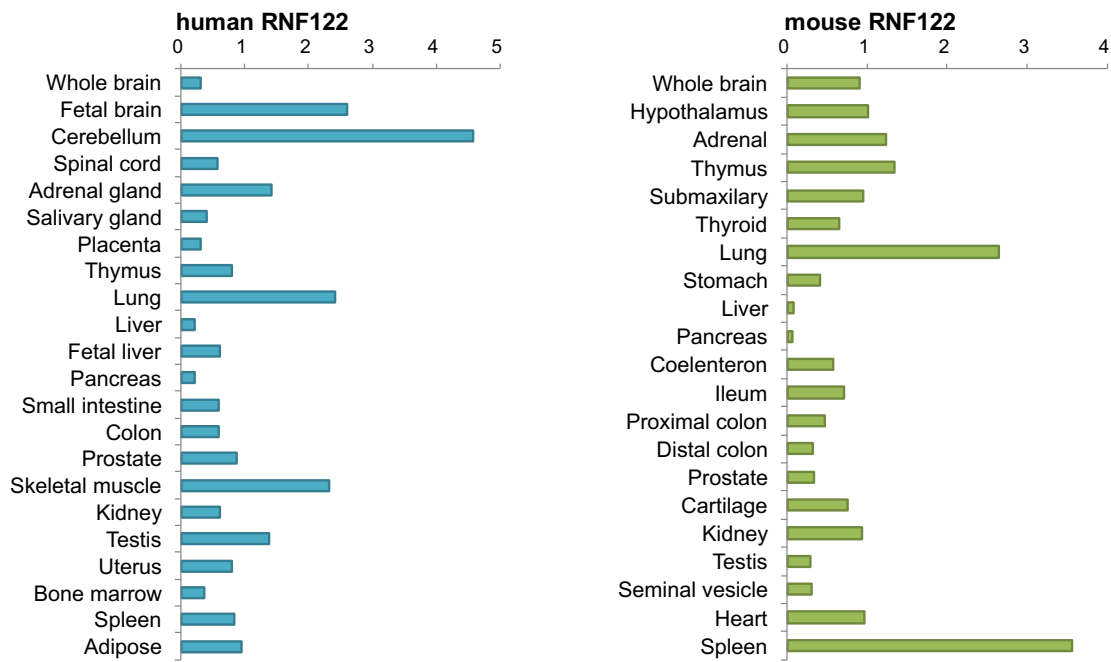

**f**

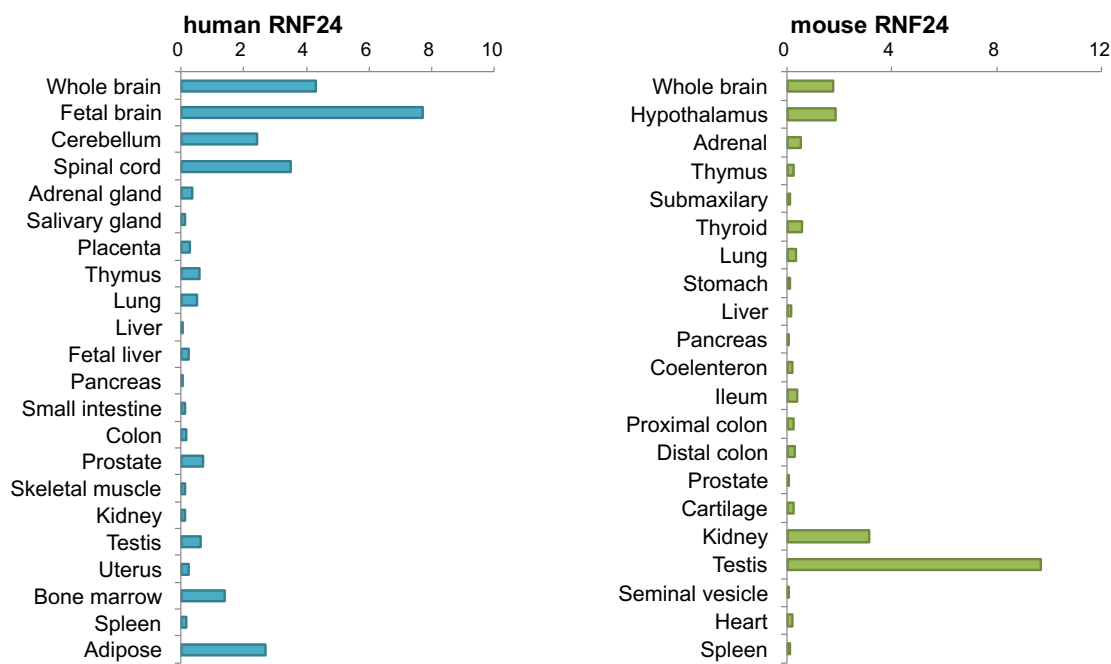

**g**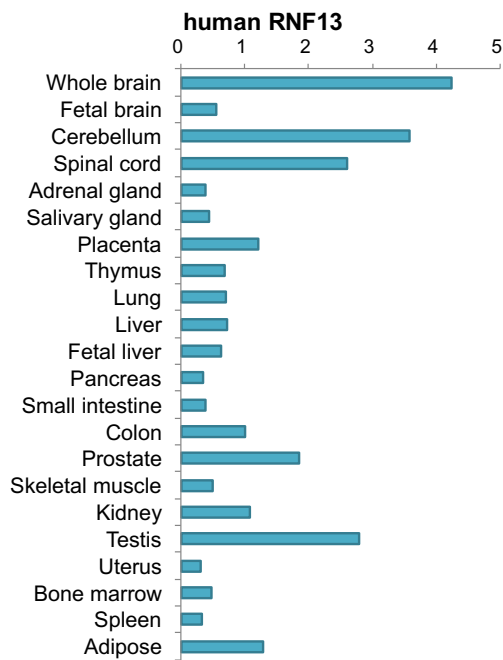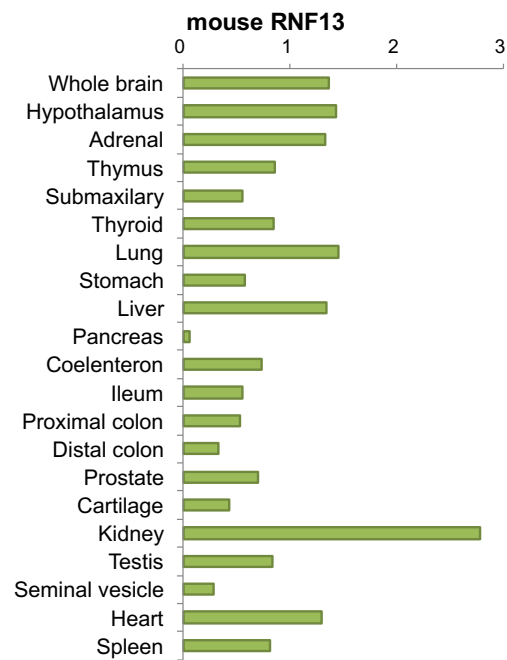**h**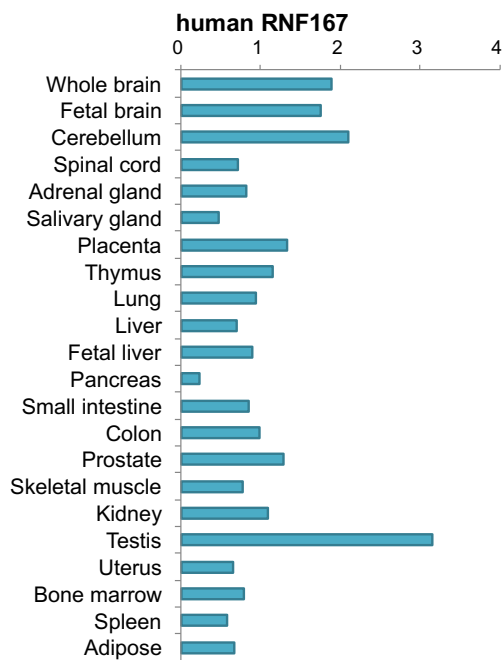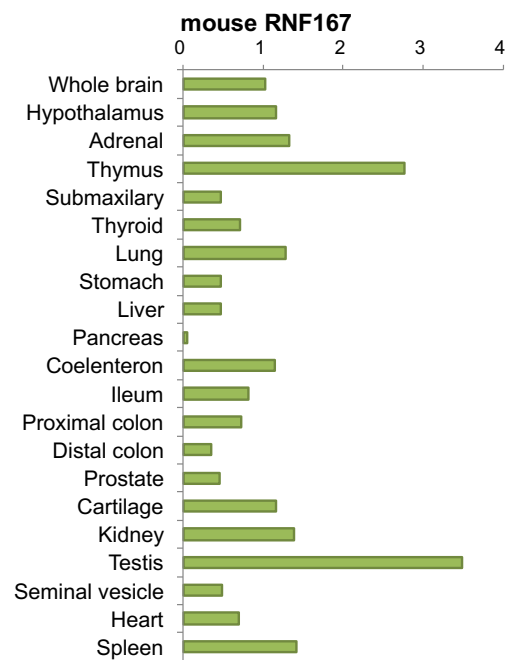

i

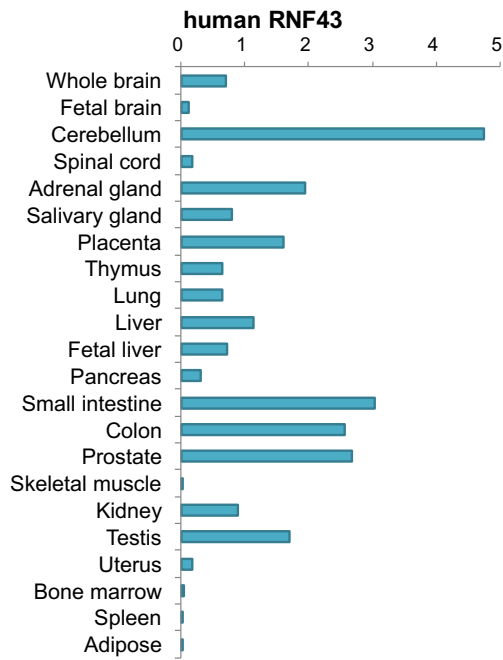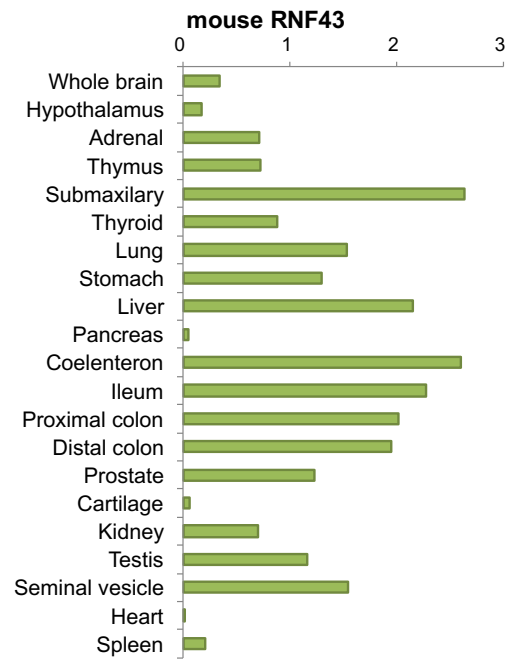

j

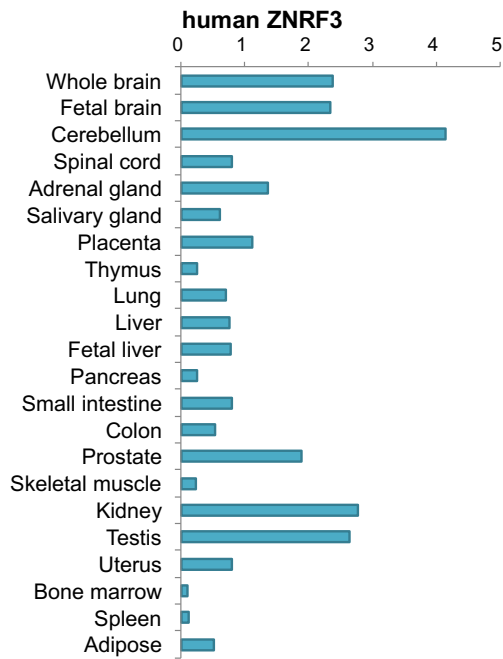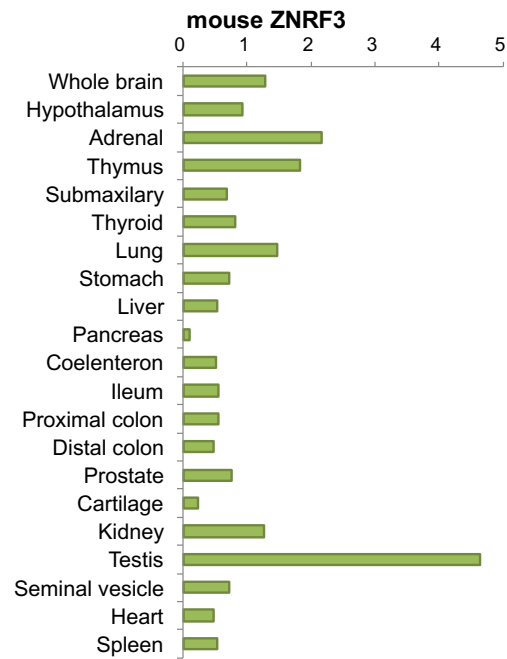



**k**

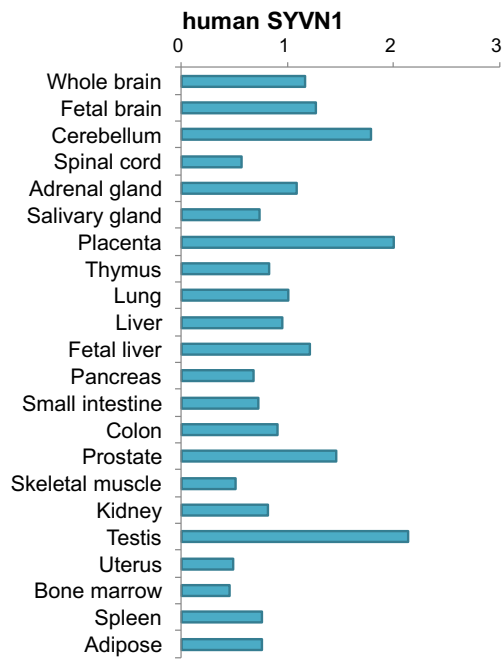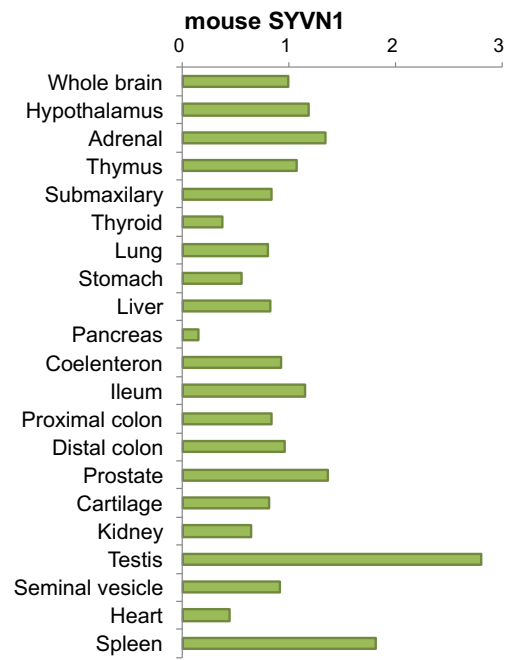

**l**

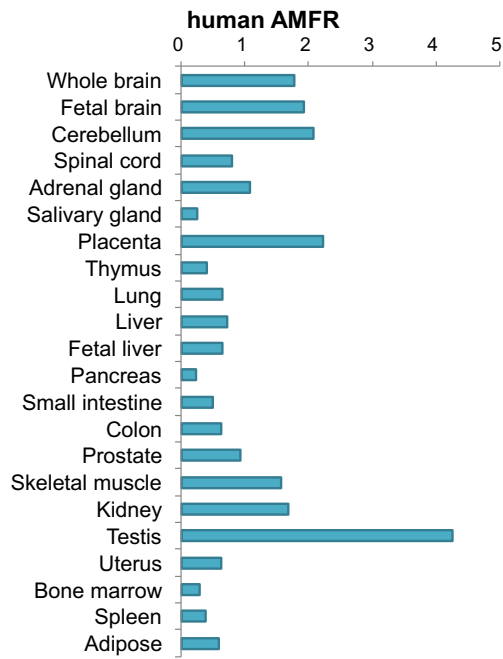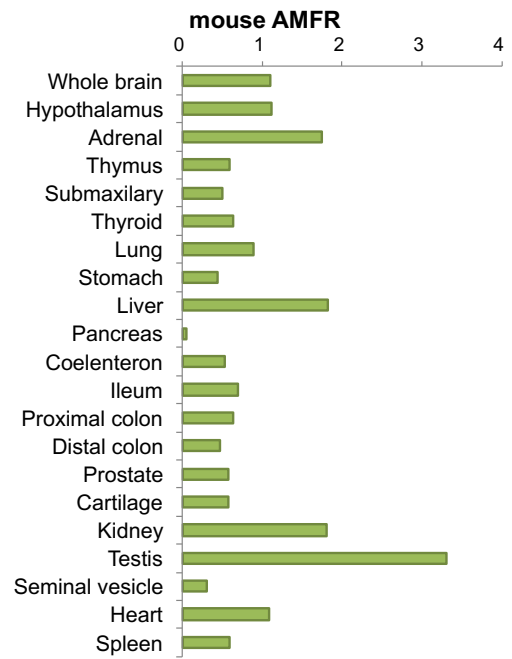

**m**

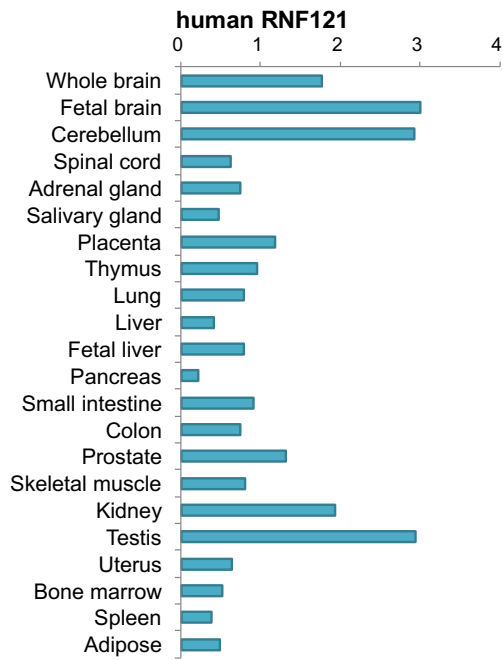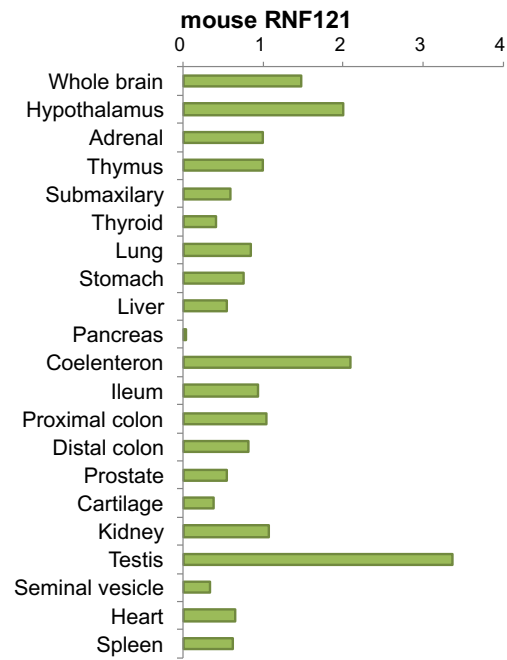

**n**

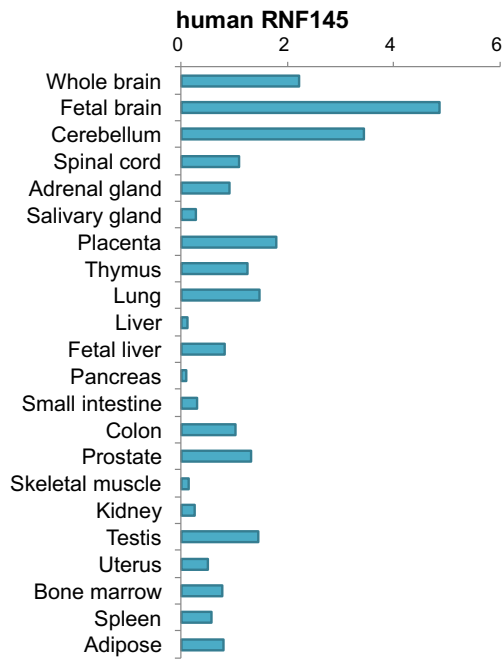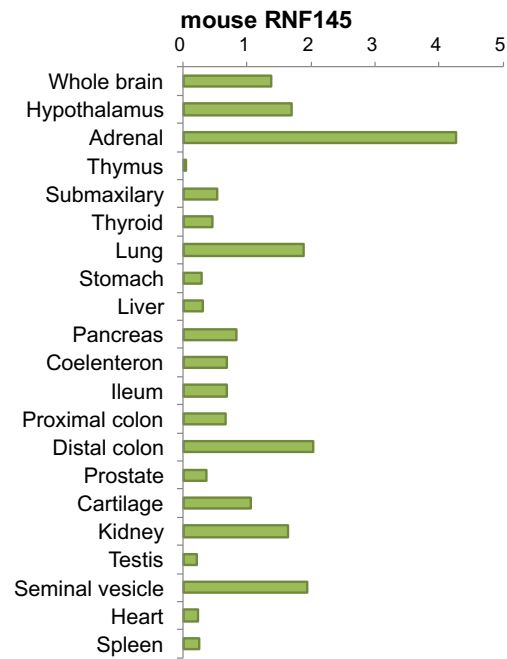

**o**

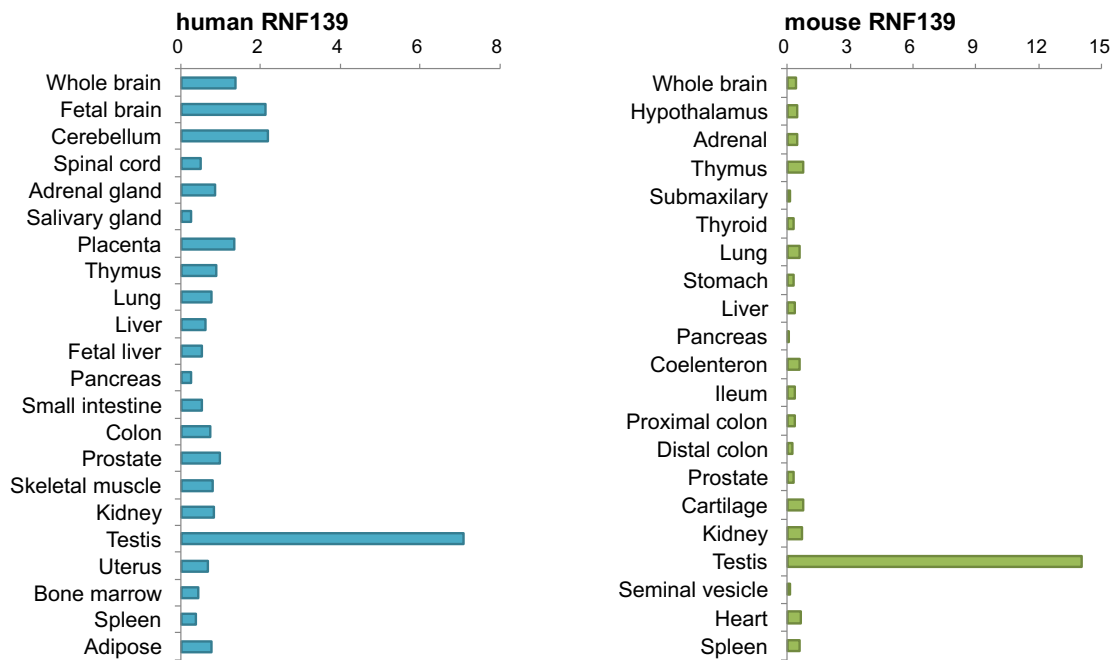

**p**

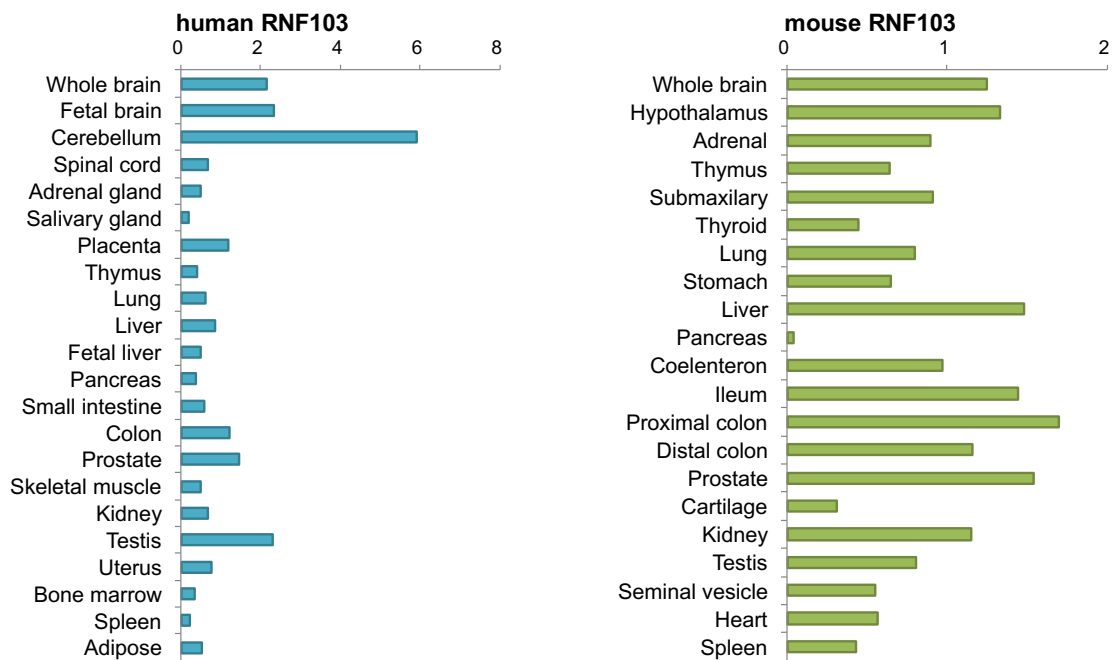

**Supplementary Fig. S4. Tissue distribution of E3 ligases (C3H2C3 type) in human and mouse tissues.** Total RNAs from 23 human or 22 mouse tissues were reverse-transcribed and measured by TaqMan-based real-time PCR assay using the delta–delta Ct method. Data are normalised to the amount of 18S ribosomal RNA; results are expressed as the fold increase compared with cDNA pools from each tissue.

**a**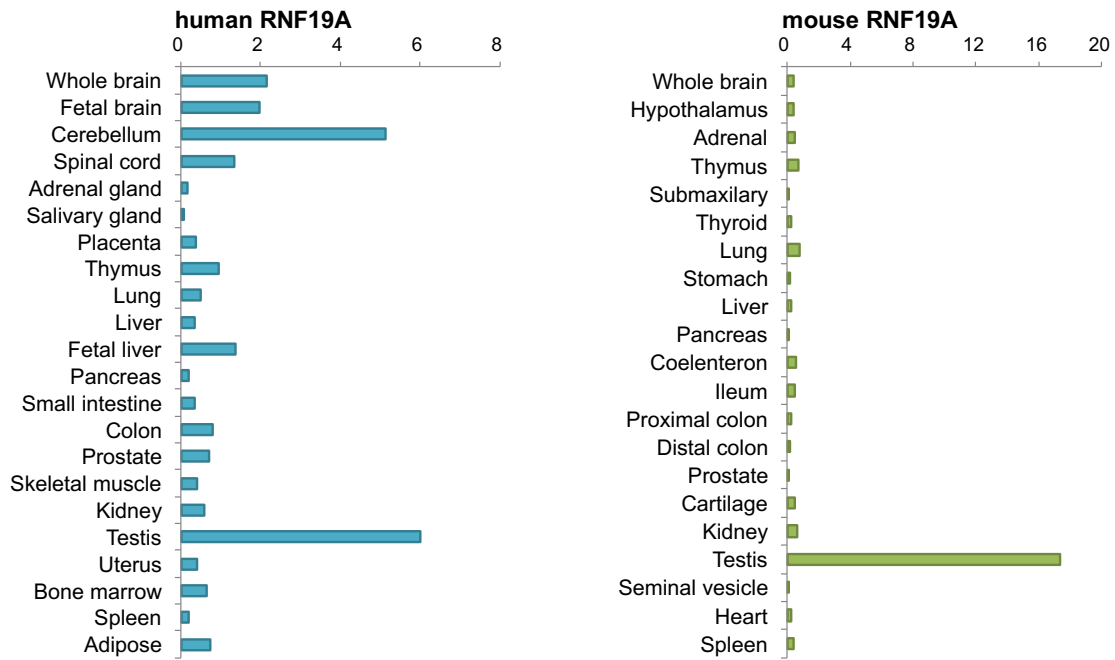**b**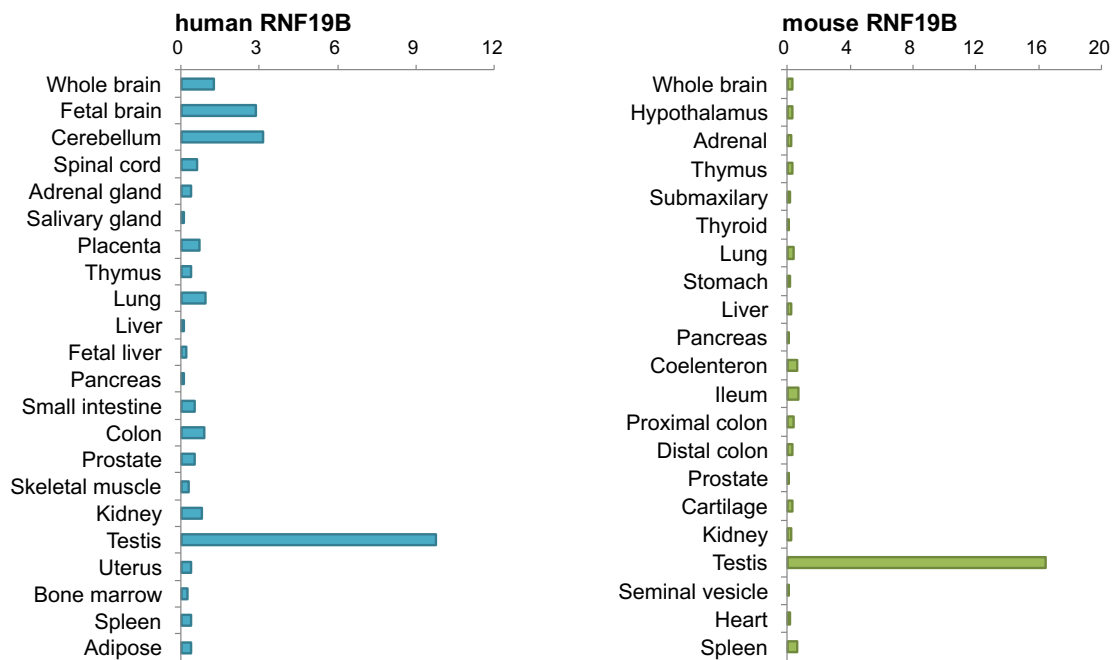

**c**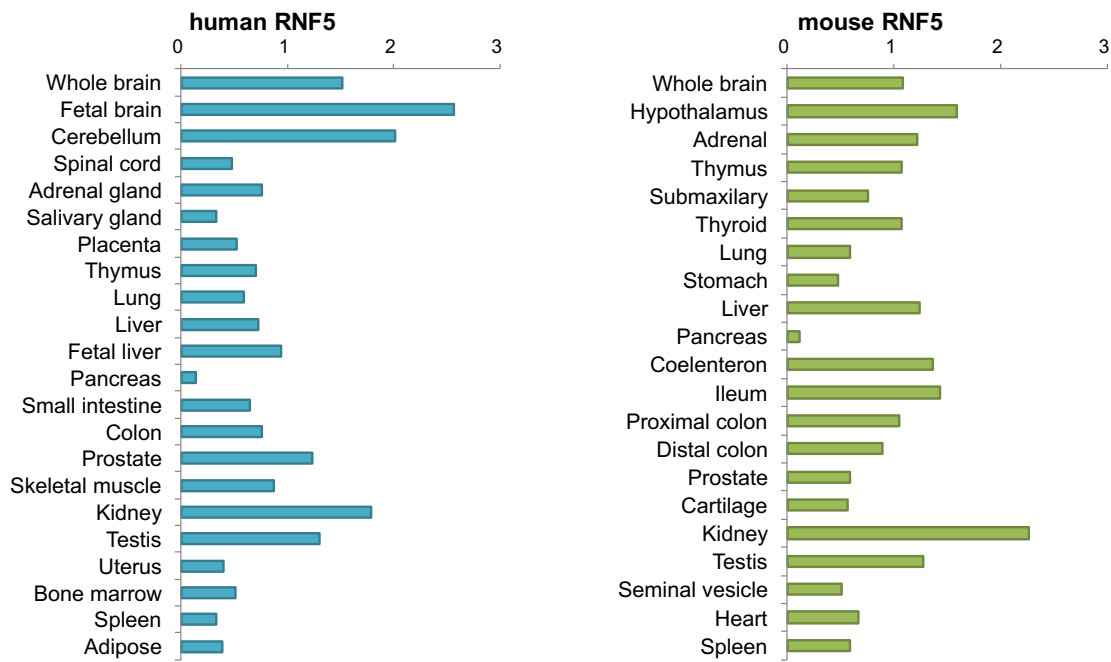**d**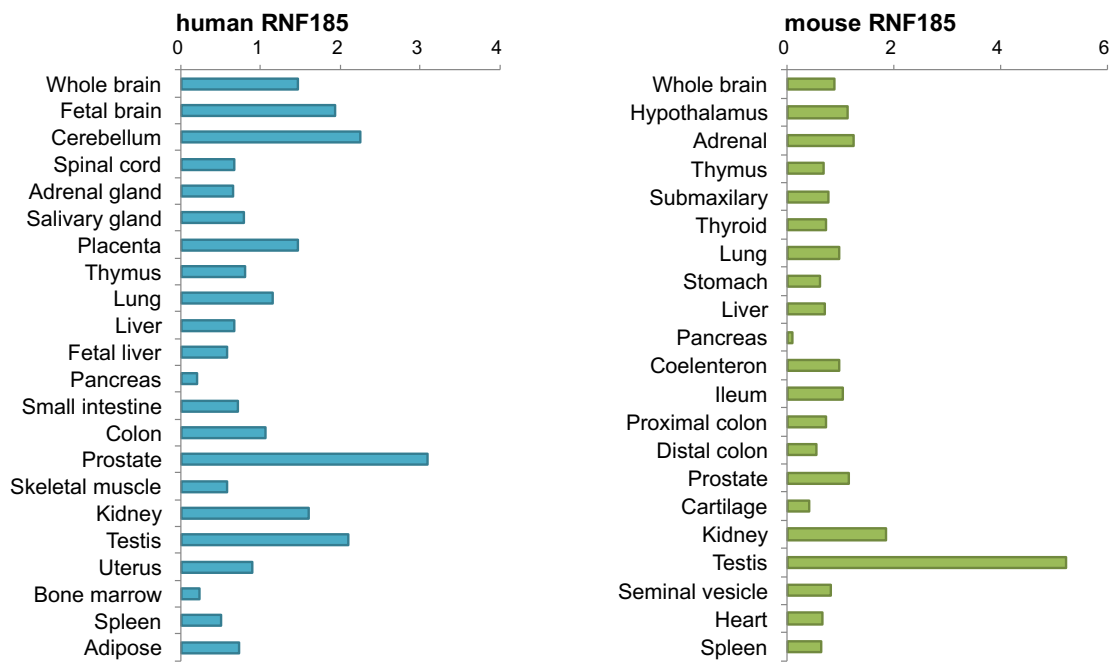

**e**

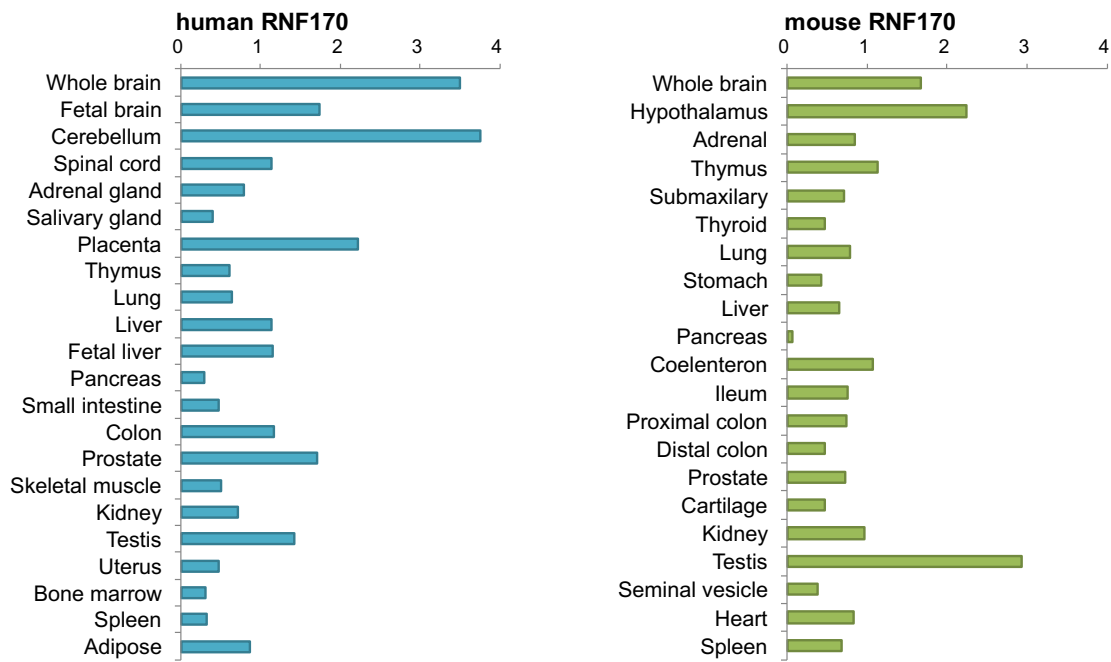

**f**

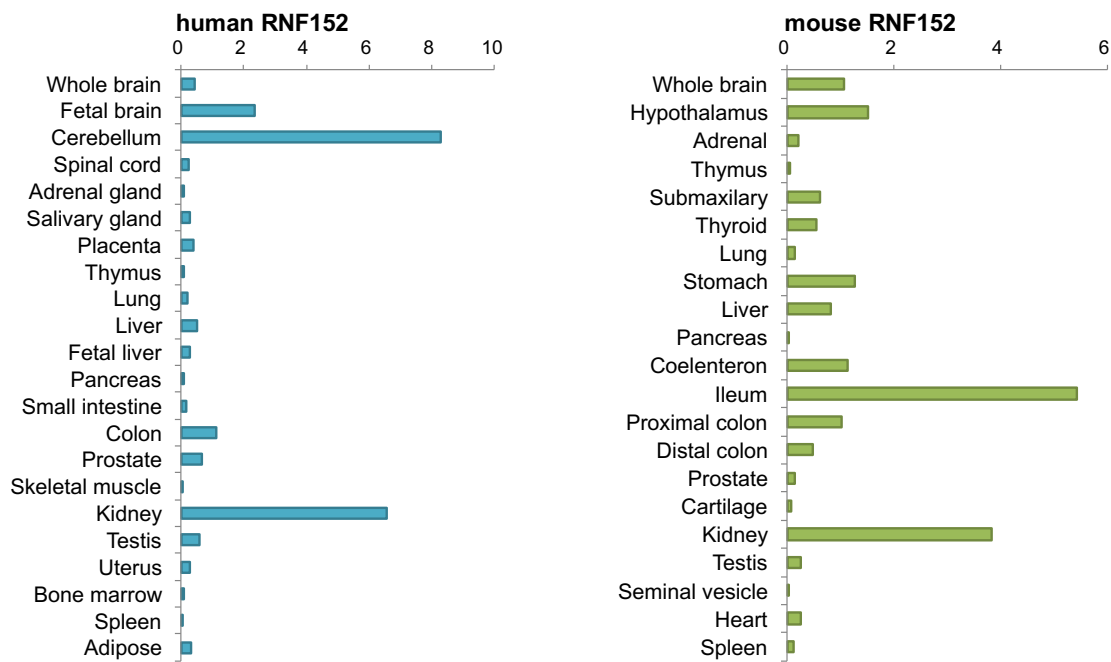

**g**

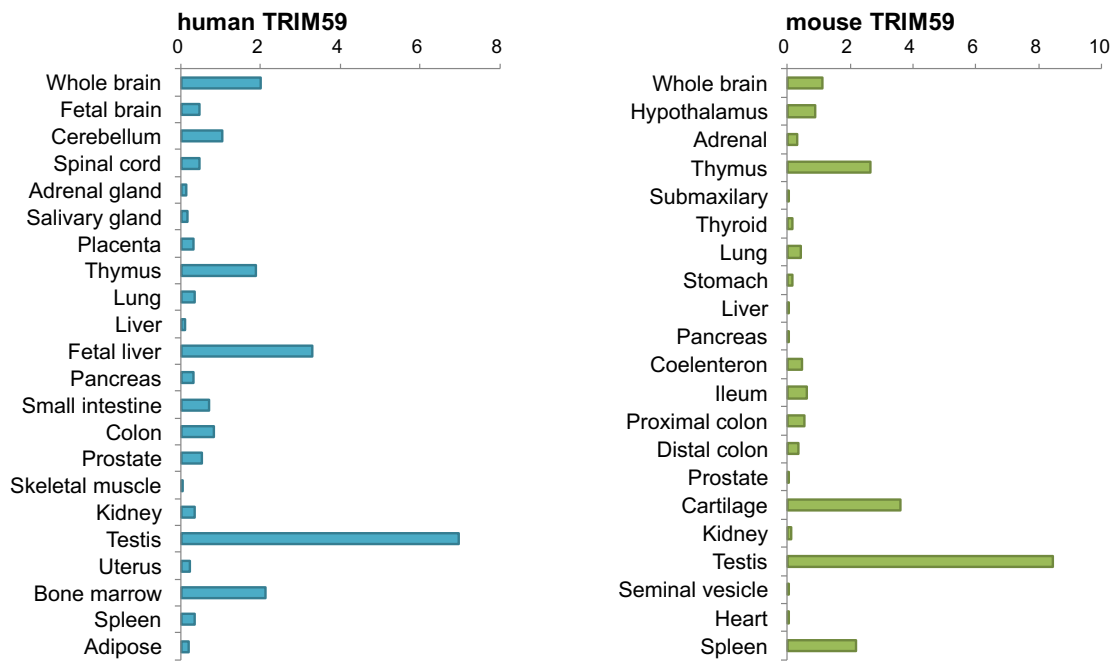

**h**

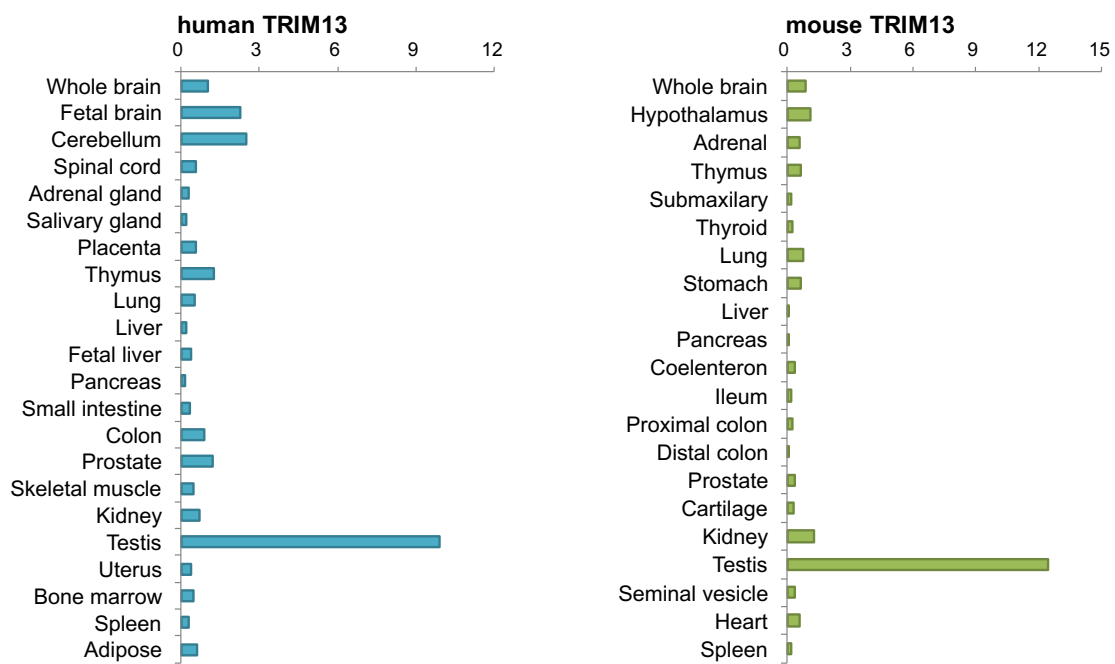

i

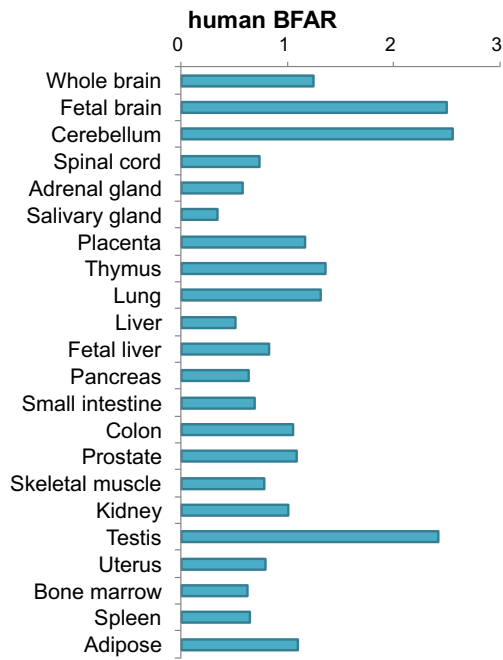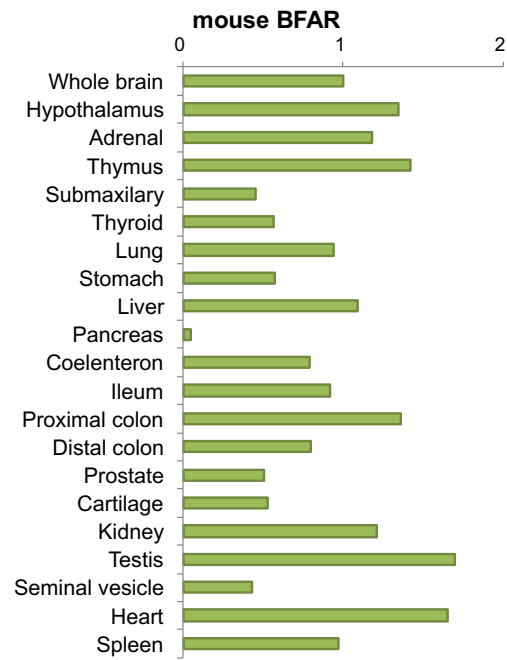

j

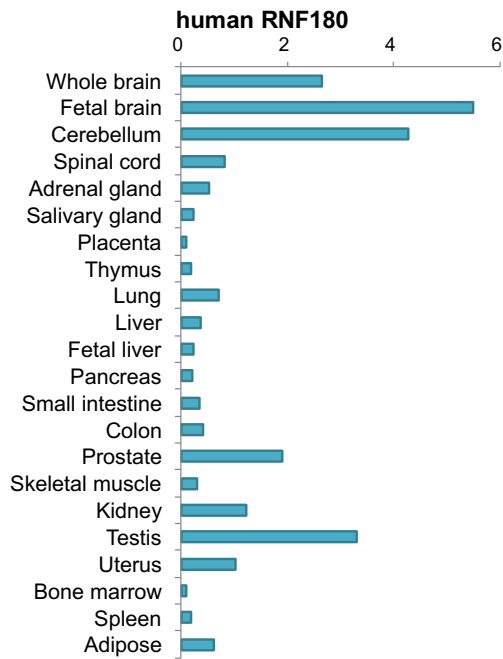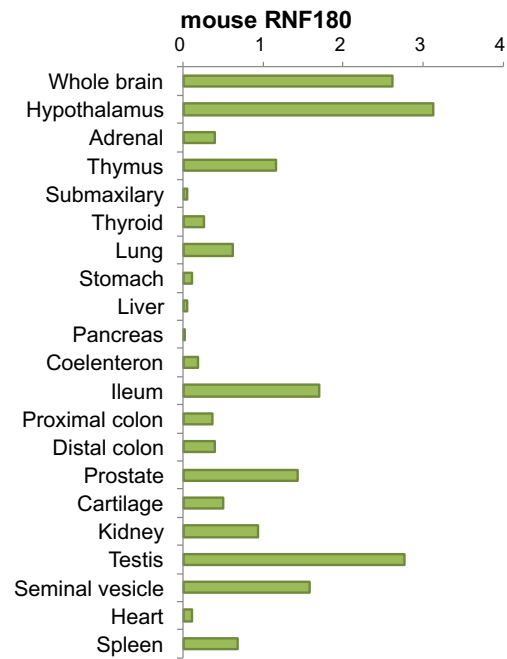



**k**

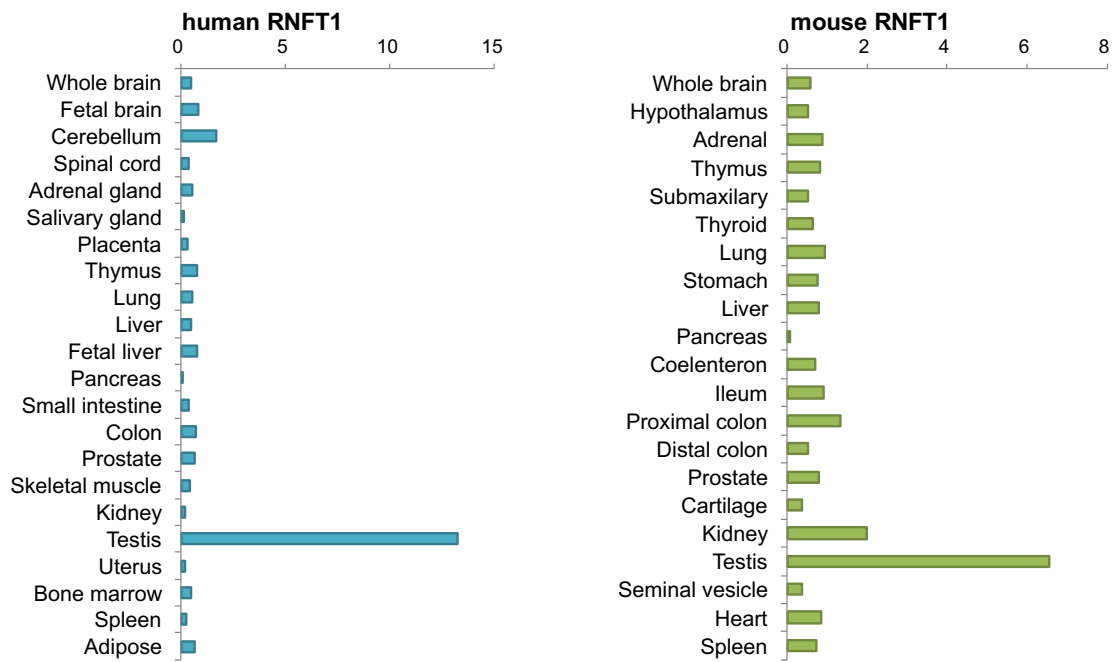

**l**

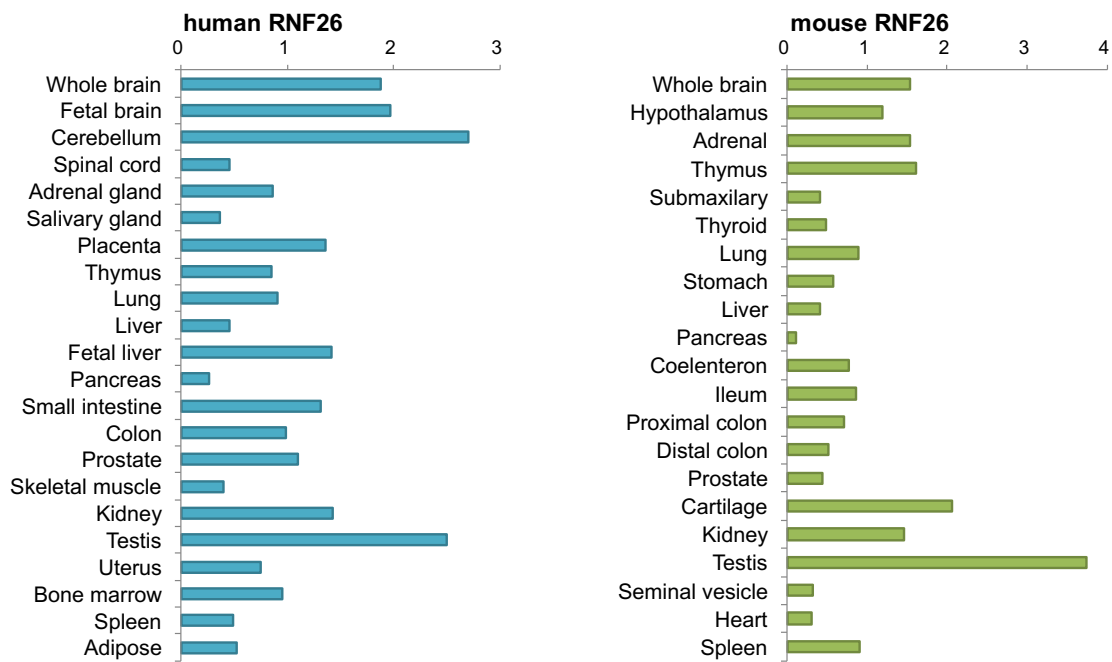

**m**

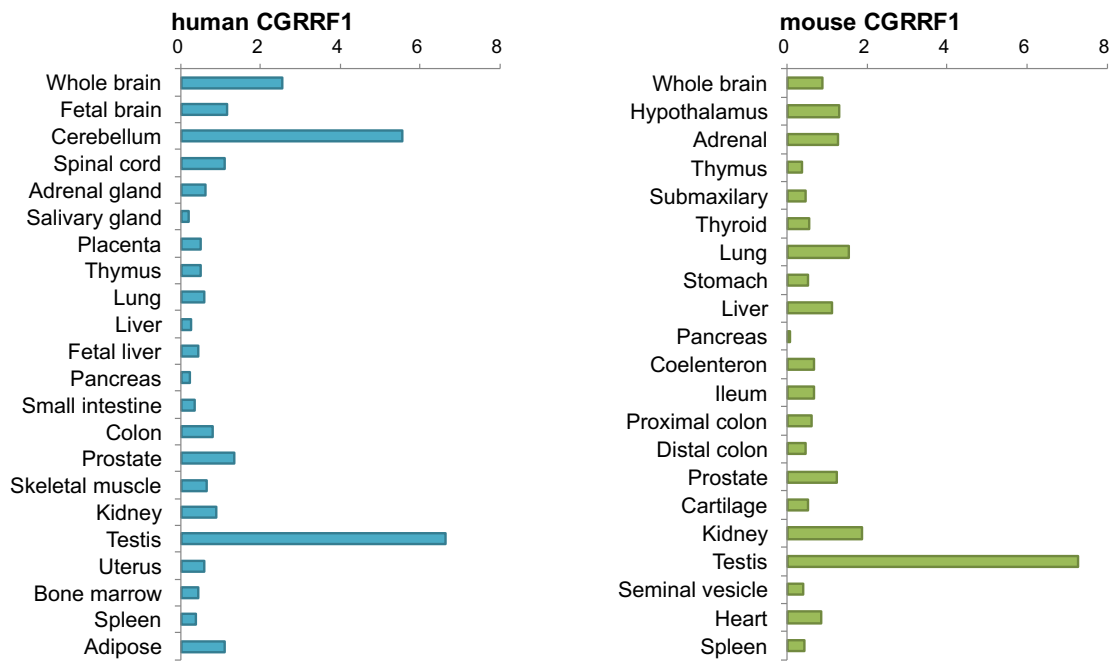

**n**

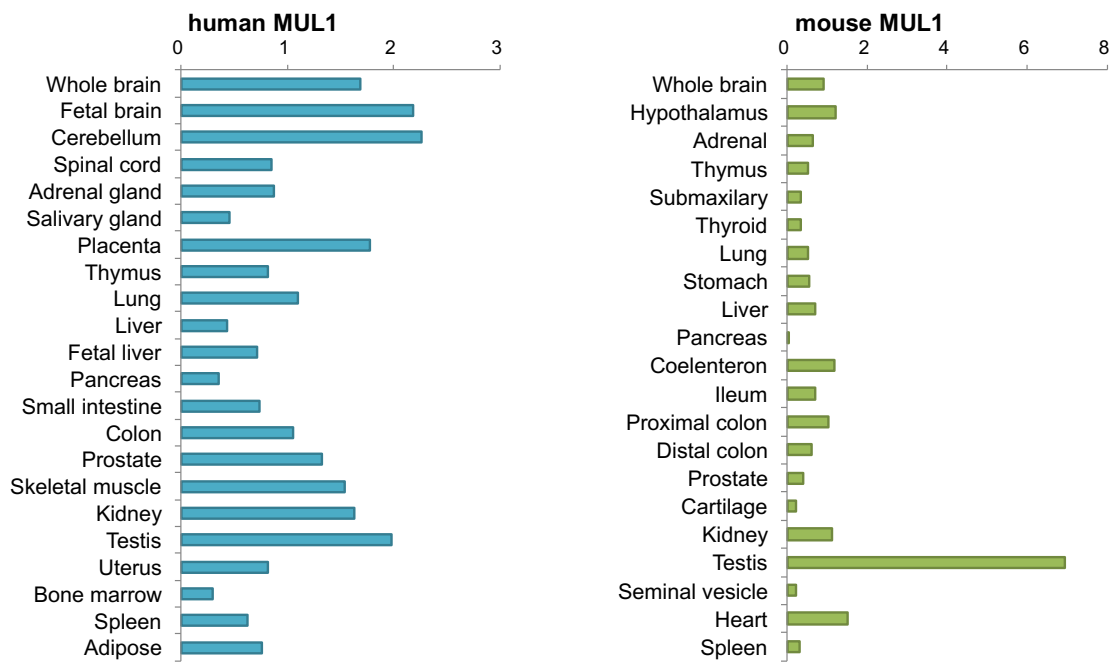

O

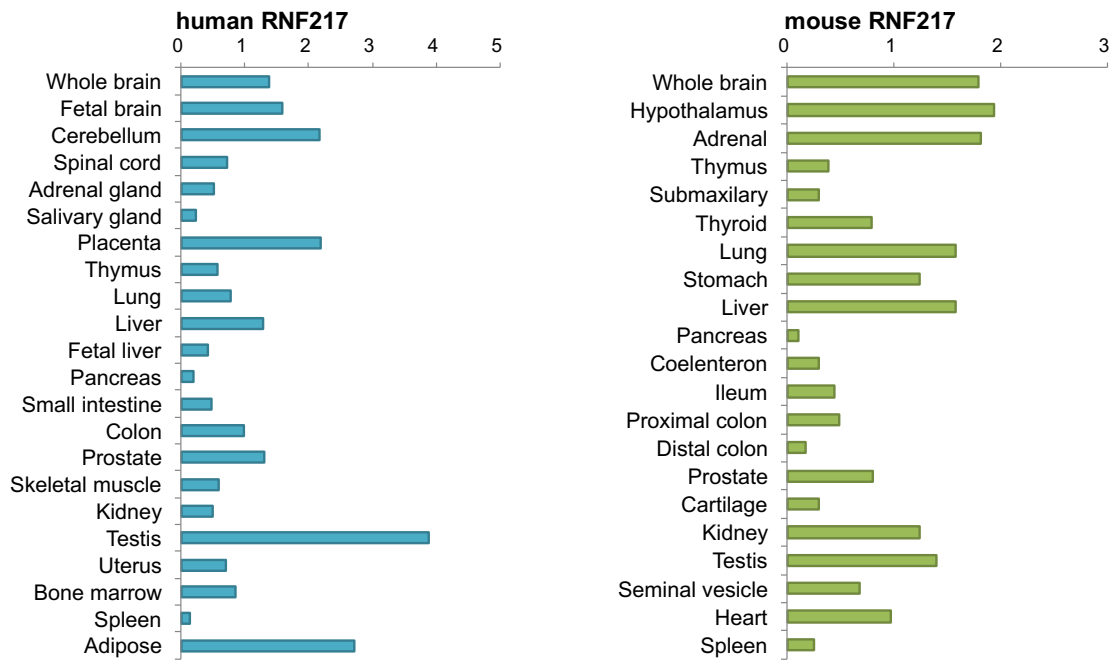

**Supplementary Fig. S5. Tissue distribution of E3 ligases (C3HC4 type) in human and mouse tissues.** Total RNAs from 23 human or 22 mouse tissues were reverse-transcribed and measured by TaqMan-based real-time PCR assay using the delta–delta Ct method. Data are normalised to the amount of 18S ribosomal RNA; results are expressed as the fold increase compared with cDNA pools from each tissue.

**a**

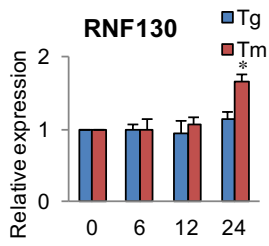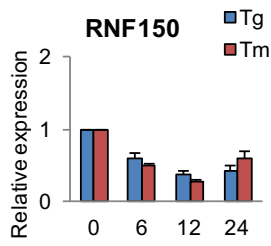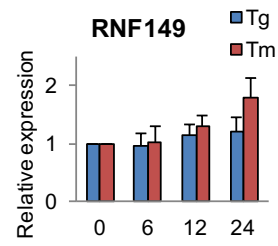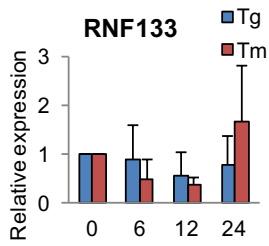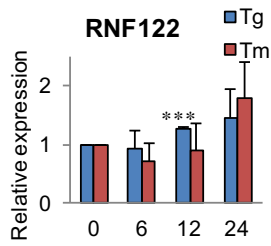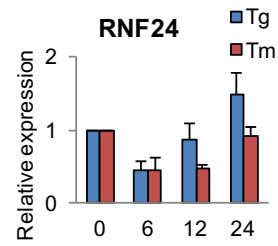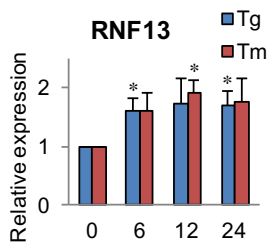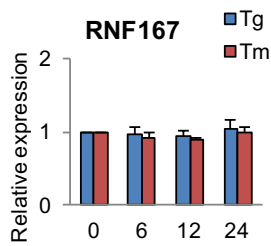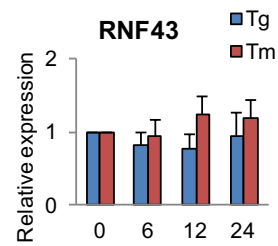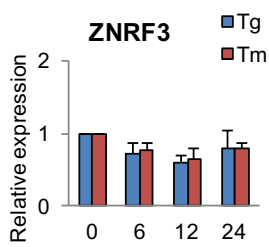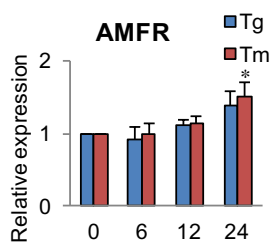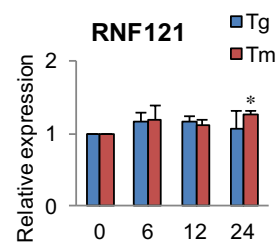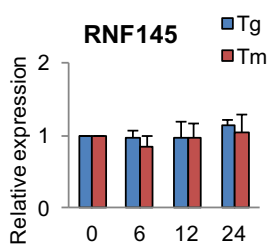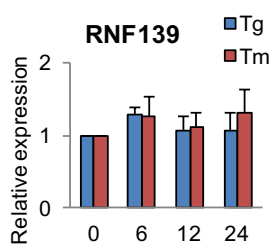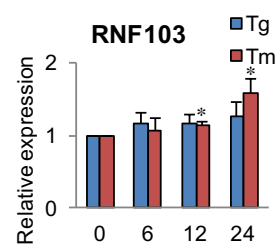

**b**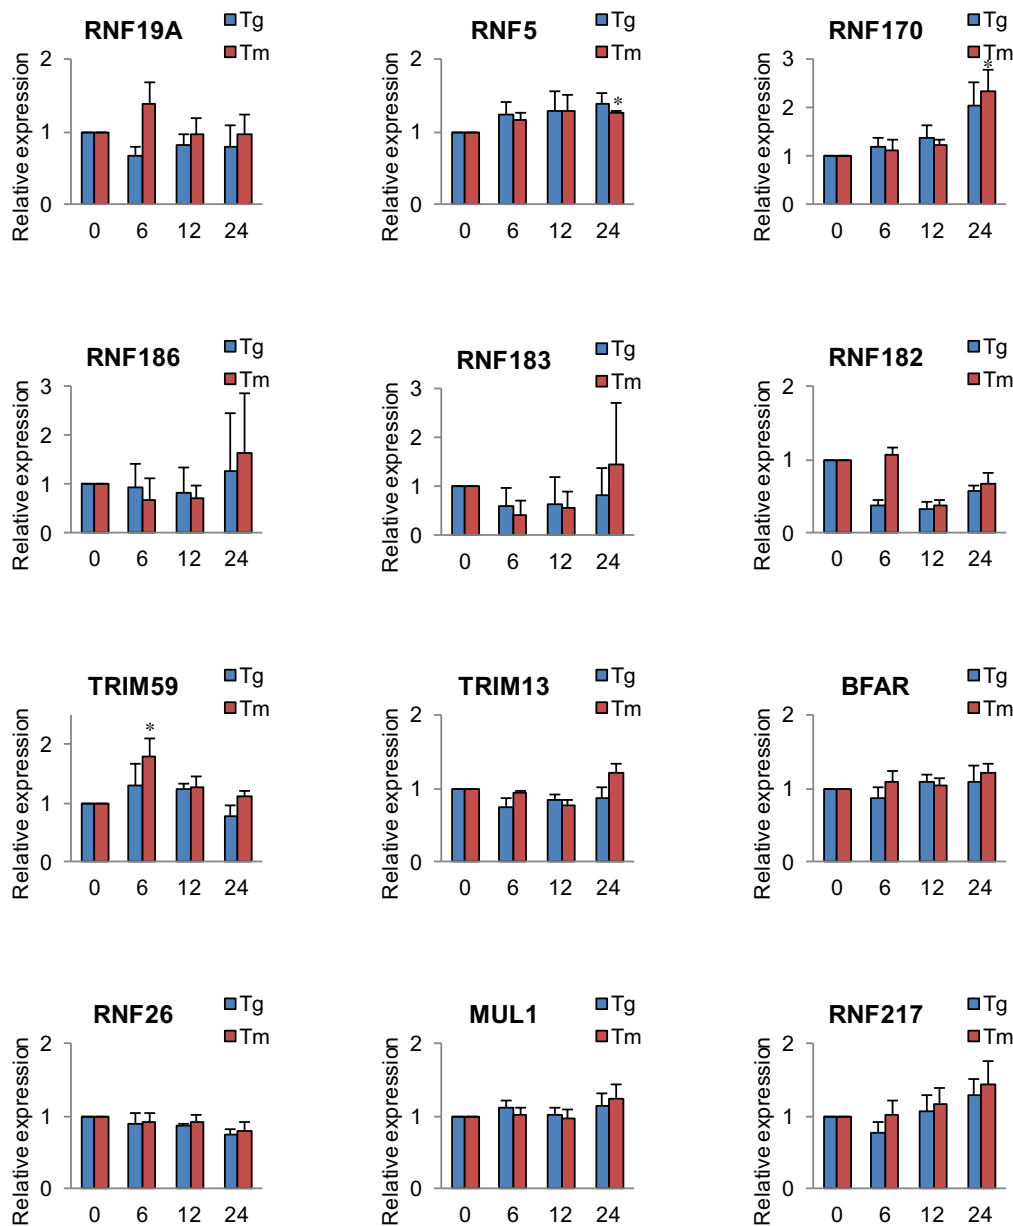

**Supplementary Fig. S6. ER stress response of transmembrane E3 ligases. (a) C3H2C3-RING E3s. (b) C3HC4-RING E3s.** Expression of E3 ligases induced by ER stressor. HeLa cells were treated with thapsigargin (Tg; 1  $\mu$ M) and tunicamycin (Tm; 3  $\mu$ g/ml) for the time periods as indicated. Total RNAs were reverse-transcribed and measured by TaqMan-based real-time PCR assay using the delta–delta Ct method. Data are normalized to the amount of GAPDH; results are expressed as the fold increase compared with control (mean  $\pm$  SD; n = 4). Statistical analysis was performed with ANOVA followed by Bonferroni correction (vs. control; \*p < 0.05, \*\*p < 0.01, \*\*\*p < 0.001). Expression of RNF128, ZNRF4, RNF175, RNF152 and RNF180 was not detected in HeLa cells because their levels were below the detection limit.

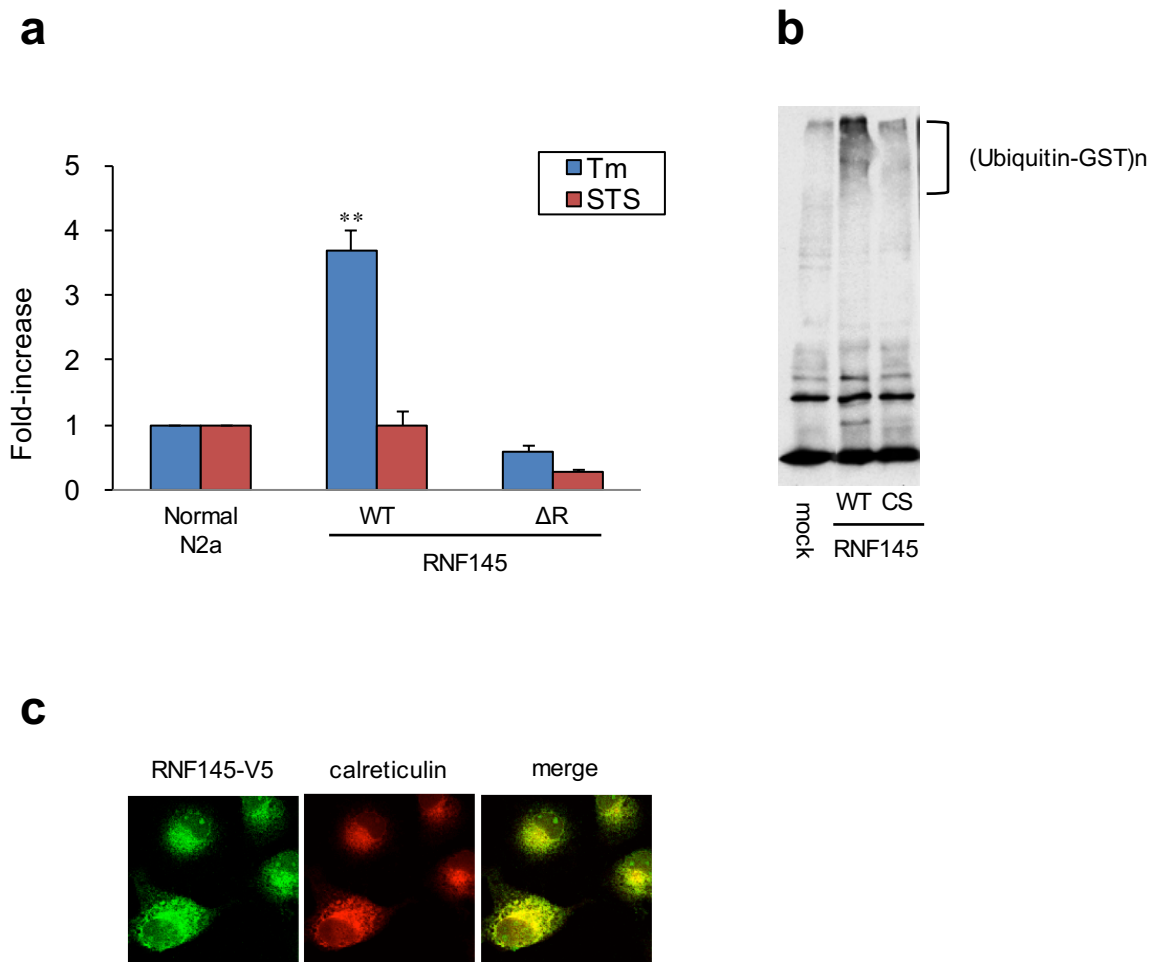

**Supplementary Fig. S7. Characterisation of RNF145 for ERAD E3 ligase.** (a) RNF145 protects against ER stress-induced cell death. Neuro-2a (N2a) cells (control) and those stably expressing WT or  $\Delta$ RING ( $\Delta$ R) mutant of RNF145 were treated with Tm (1  $\mu$ g/ml) or staurosporine (STS; 0.2  $\mu$ M) and incubated for 42 h. The cells were stained with crystal violet. The eluted dye at an optical density of 590 nm was measured. Cell viability was calculated as follows: OD for assay/OD for control well. The results are expressed as the fold increase compared with normal cells. The results are expressed as the means  $\pm$  SD (three independent experiments in duplicate). Statistical analysis was performed with ANOVA followed by Bonferroni correction (vs. controls; \* $p < 0.05$ , \*\* $p < 0.01$ ) (b) *In vitro* autoubiquitination assay. The RNF145 proteins produced by a transcription/translation system were mixed in the reaction buffer with E1 (rabbit), E2 (GST-UbcH5c) and GST-ubiquitin. The reaction mixture was immunoprecipitated with anti-V5 antibody and analysed by Western blotting using anti-GST antibody. CS mutants defective in E3 activity were constructed by replacement of conserved coordinating Cys with Ser residues in the RING (c) Subcellular localization of RNF145. COS-1 cells transiently transfected with RNF145-V5. The cells were subjected to immunofluorescence staining with anti-V5 and calreticulin antibodies.

**Supplementary Table S1a** Tissue distribution of transmembrane E3 ligases (human C3H2C3 type).

|        | Whole brain | Fetal brain | Cerebellum | Spinal cord | Adrenal gland | Salivary gland | Placenta | Thymus | Lung | Liver | Fetal liver | Pancreas | Small intestine | Colon | Prostate | Skeletal muscle | Kidney | Testis | Uterus | Bone marrow | Spleen | Adipose |
|--------|-------------|-------------|------------|-------------|---------------|----------------|----------|--------|------|-------|-------------|----------|-----------------|-------|----------|-----------------|--------|--------|--------|-------------|--------|---------|
| RNF130 | 3.89        | 0.48        | 2.51       | 1.87        | 0.57          | 0.52           | 0.84     | 0.24   | 0.64 | 0.99  | 0.65        | 0.35     | 0.56            | 0.59  | 0.55     | 0.42            | 1.70   | 0.88   | 0.54   | 3.11        | 0.45   | 1.55    |
| RNF150 | 1.91        | 5.51        | 4.27       | 0.55        | 1.75          | 1.70           | 0.13     | 0.38   | 0.24 | 0.05  | 0.11        | 0.06     | 0.49            | 0.87  | 1.20     | 0.91            | 0.99   | 0.74   | 1.23   | 0.03        | 0.40   | 0.91    |
| RNF149 | 1.40        | 1.09        | 1.58       | 0.64        | 0.68          | 0.42           | 2.04     | 1.57   | 2.12 | 0.61  | 0.83        | 0.28     | 0.55            | 1.08  | 1.38     | 0.26            | 1.11   | 2.92   | 0.66   | 1.25        | 1.36   | 0.99    |
| RNF133 | 0.33        | 0.09        | 9.10       | 0.11        | 0.08          | 0.13           | 0.07     | 0.07   | 0.19 | 0.09  | 0.10        | 0.10     | 0.14            | 0.23  | 0.52     | 0.01            | 0.30   | 14.23  | 0.26   | 0.02        | 0.01   | 0.20    |
| RNF128 | 0.88        | 0.24        | 0.40       | 1.23        | 1.29          | 0.85           | 1.04     | 0.19   | 0.45 | 4.73  | 3.30        | 0.51     | 1.74            | 2.77  | 0.42     | 0.67            | 1.77   | 0.17   | 0.00   | 0.06        | 0.00   | 0.02    |
| RNF122 | 0.31        | 2.60        | 4.57       | 0.57        | 1.43          | 0.40           | 0.31     | 0.79   | 2.41 | 0.21  | 0.62        | 0.21     | 0.58            | 0.59  | 0.87     | 2.32            | 0.60   | 1.37   | 0.80   | 0.36        | 0.84   | 0.95    |
| RNF24  | 4.30        | 7.70        | 2.42       | 3.49        | 0.35          | 0.12           | 0.30     | 0.58   | 0.52 | 0.01  | 0.26        | 0.01     | 0.12            | 0.16  | 0.72     | 0.12            | 0.13   | 0.62   | 0.26   | 1.39        | 0.15   | 2.69    |
| RNF13  | 4.24        | 0.55        | 3.58       | 2.61        | 0.39          | 0.44           | 1.22     | 0.69   | 0.71 | 0.71  | 0.64        | 0.35     | 0.38            | 1.01  | 1.85     | 0.49            | 1.07   | 2.79   | 0.31   | 0.47        | 0.32   | 1.30    |
| RNF167 | 1.89        | 1.76        | 2.10       | 0.71        | 0.82          | 0.48           | 1.33     | 1.15   | 0.94 | 0.70  | 0.89        | 0.23     | 0.85            | 0.98  | 1.29     | 0.77            | 1.09   | 3.16   | 0.65   | 0.79        | 0.58   | 0.68    |
| ZNRF4  | 0.01        | 0.14        | 0.01       | 0.00        | 0.00          | 0.00           | 0.00     | 0.00   | 0.00 | 0.00  | 0.00        | 0.00     | 0.00            | 0.00  | 0.00     | 0.00            | 0.00   | 24.60  | 0.00   | 0.00        | 0.00   | 0.00    |
| RNF43  | 0.70        | 0.13        | 4.76       | 0.17        | 1.94          | 0.80           | 1.60     | 0.64   | 0.65 | 1.13  | 0.72        | 0.32     | 3.05            | 2.57  | 2.68     | 0.02            | 0.89   | 1.71   | 0.18   | 0.04        | 0.04   | 0.02    |
| ZNRF3  | 2.39        | 2.34        | 4.15       | 0.80        | 1.36          | 0.62           | 1.12     | 0.25   | 0.71 | 0.76  | 0.79        | 0.25     | 0.79            | 0.53  | 1.89     | 0.24            | 2.78   | 2.64   | 0.81   | 0.11        | 0.12   | 0.51    |
| SYVN1  | 1.17        | 1.27        | 1.79       | 0.57        | 1.08          | 0.74           | 2.00     | 0.82   | 1.01 | 0.96  | 1.21        | 0.68     | 0.73            | 0.90  | 1.46     | 0.51            | 0.82   | 2.14   | 0.50   | 0.46        | 0.76   | 0.76    |
| AMFR   | 1.77        | 1.92        | 2.07       | 0.80        | 1.09          | 0.25           | 2.24     | 0.40   | 0.66 | 0.72  | 0.65        | 0.23     | 0.49            | 0.63  | 0.93     | 1.56            | 1.67   | 4.25   | 0.62   | 0.30        | 0.39   | 0.59    |
| RNF175 | 9.69        | 8.05        | 8.07       | 0.65        | 0.10          | 0.07           | 0.01     | 0.01   | 0.02 | 0.00  | 0.02        | 1.83     | 0.03            | 0.04  | 0.31     | 0.00            | 0.00   | 1.44   | 0.02   | 0.07        | 0.01   | 0.20    |
| RNF121 | 1.76        | 3.00        | 2.93       | 0.62        | 0.74          | 0.47           | 1.18     | 0.96   | 0.80 | 0.41  | 0.79        | 0.22     | 0.91            | 0.75  | 1.32     | 0.81            | 1.94   | 2.94   | 0.63   | 0.52        | 0.38   | 0.48    |
| RNF145 | 2.23        | 4.86        | 3.44       | 1.09        | 0.90          | 0.28           | 1.79     | 1.25   | 1.47 | 0.13  | 0.82        | 0.10     | 0.30            | 1.03  | 1.31     | 0.15            | 0.26   | 1.45   | 0.50   | 0.79        | 0.57   | 0.79    |
| RNF139 | 1.36        | 2.11        | 2.18       | 0.50        | 0.84          | 0.27           | 1.33     | 0.88   | 0.77 | 0.63  | 0.54        | 0.26     | 0.51            | 0.73  | 0.98     | 0.78            | 0.84   | 7.08   | 0.69   | 0.43        | 0.37   | 0.77    |
| RNF103 | 2.14        | 2.33        | 5.93       | 0.69        | 0.48          | 0.19           | 1.19     | 0.42   | 0.60 | 0.85  | 0.50        | 0.36     | 0.59            | 1.21  | 1.47     | 0.50            | 0.68   | 2.31   | 0.77   | 0.34        | 0.23   | 0.53    |

**Supplementary Table S1b** Tissue distribution of transmembrane E3 ligases (human C3HC4 type).

|        | Whole brain | Fetal brain | Cerebellum | Spinal cord | Adrenal gland | Salivary gland | Placenta | Thymus | Lung | Liver | Fetal liver | Pancreas | Small intestine | Colon | Prostate | Skeletal muscle | Kidney | Testis | Uterus | Bone marrow | Spleen | Adipose |
|--------|-------------|-------------|------------|-------------|---------------|----------------|----------|--------|------|-------|-------------|----------|-----------------|-------|----------|-----------------|--------|--------|--------|-------------|--------|---------|
| RNF19A | 2.14        | 1.97        | 5.13       | 1.33        | 0.15          | 0.08           | 0.39     | 0.94   | 0.48 | 0.33  | 1.37        | 0.18     | 0.34            | 0.79  | 0.70     | 0.39            | 0.59   | 6.00   | 0.39   | 0.64        | 0.21   | 0.73    |
| RNF19B | 1.27        | 2.86        | 3.15       | 0.61        | 0.39          | 0.13           | 0.72     | 0.38   | 0.93 | 0.11  | 0.19        | 0.11     | 0.53            | 0.90  | 0.54     | 0.28            | 0.79   | 9.76   | 0.39   | 0.25        | 0.37   | 0.38    |
| RNF5   | 1.51        | 2.56        | 2.01       | 0.47        | 0.76          | 0.33           | 0.53     | 0.71   | 0.59 | 0.72  | 0.94        | 0.14     | 0.65            | 0.76  | 1.23     | 0.87            | 1.79   | 1.30   | 0.40   | 0.51        | 0.34   | 0.39    |
| RNF185 | 1.47        | 1.94        | 2.25       | 0.67        | 0.66          | 0.79           | 1.46     | 0.81   | 1.15 | 0.66  | 0.58        | 0.21     | 0.71            | 1.06  | 3.09     | 0.58            | 1.60   | 2.10   | 0.89   | 0.24        | 0.50   | 0.73    |
| RNF170 | 3.51        | 1.73        | 3.75       | 1.14        | 0.79          | 0.40           | 2.22     | 0.60   | 0.64 | 1.13  | 1.15        | 0.30     | 0.47            | 1.17  | 1.71     | 0.51            | 0.72   | 1.43   | 0.47   | 0.31        | 0.33   | 0.87    |
| RNF186 | 1.40        | 0.01        | 5.29       | 0.03        | 0.00          | 0.01           | 0.05     | 0.01   | 0.03 | 0.12  | 0.02        | 5.44     | 4.99            | 4.37  | 0.02     | 0.00            | 4.45   | 0.23   | 0.01   | 0.17        | 0.00   | 0.01    |
| RNF152 | 0.45        | 2.34        | 8.28       | 0.25        | 0.08          | 0.27           | 0.39     | 0.08   | 0.21 | 0.51  | 0.28        | 0.11     | 0.16            | 1.13  | 0.68     | 0.06            | 6.57   | 0.59   | 0.27   | 0.09        | 0.01   | 0.33    |
| RNF183 | 0.11        | 0.33        | 0.58       | 0.15        | 0.04          | 0.17           | 0.14     | 0.10   | 0.46 | 0.06  | 0.08        | 0.08     | 0.15            | 0.26  | 0.68     | 0.01            | 8.68   | 8.96   | 0.46   | 0.02        | 0.02   | 0.02    |
| RNF182 | 2.85        | 9.35        | 10.06      | 1.04        | 0.02          | 0.04           | 0.14     | 0.31   | 0.59 | 0.00  | 0.56        | 0.03     | 0.10            | 0.02  | 0.04     | 0.02            | 0.40   | 2.08   | 0.03   | 1.16        | 0.00   | 0.14    |
| TRIM59 | 2.00        | 0.45        | 1.04       | 0.46        | 0.13          | 0.17           | 0.32     | 1.87   | 0.35 | 0.09  | 3.30        | 0.32     | 0.69            | 0.84  | 0.51     | 0.02            | 0.33   | 6.95   | 0.23   | 2.13        | 0.35   | 0.20    |
| TRIM13 | 1.05        | 2.28        | 2.52       | 0.55        | 0.29          | 0.20           | 0.58     | 1.27   | 0.54 | 0.20  | 0.40        | 0.15     | 0.32            | 0.89  | 1.21     | 0.47            | 0.69   | 9.88   | 0.39   | 0.48        | 0.30   | 0.61    |
| BFAR   | 1.25        | 2.50        | 2.56       | 0.73        | 0.58          | 0.35           | 1.17     | 1.36   | 1.31 | 0.52  | 0.83        | 0.64     | 0.70            | 1.05  | 1.09     | 0.78            | 1.01   | 2.42   | 0.80   | 0.62        | 0.65   | 1.10    |
| RNF180 | 2.66        | 5.49        | 4.28       | 0.83        | 0.53          | 0.23           | 0.09     | 0.19   | 0.71 | 0.36  | 0.24        | 0.21     | 0.36            | 0.42  | 1.90     | 0.30            | 1.23   | 3.30   | 1.03   | 0.11        | 0.18   | 0.62    |
| RNFT1  | 0.46        | 0.81        | 1.69       | 0.38        | 0.53          | 0.16           | 0.31     | 0.78   | 0.54 | 0.48  | 0.76        | 0.10     | 0.35            | 0.71  | 0.63     | 0.43            | 0.20   | 13.20  | 0.20   | 0.46        | 0.23   | 0.63    |
| RNF26  | 1.88        | 1.97        | 2.70       | 0.46        | 0.86          | 0.36           | 1.36     | 0.85   | 0.91 | 0.46  | 1.42        | 0.27     | 1.31            | 0.98  | 1.10     | 0.40            | 1.43   | 2.50   | 0.75   | 0.95        | 0.49   | 0.52    |
| CGRRF1 | 2.53        | 1.15        | 5.54       | 1.10        | 0.62          | 0.21           | 0.50     | 0.51   | 0.59 | 0.25  | 0.44        | 0.22     | 0.35            | 0.80  | 1.35     | 0.64            | 0.88   | 6.62   | 0.60   | 0.42        | 0.37   | 1.10    |
| MUL1   | 1.69        | 2.18        | 2.26       | 0.86        | 0.87          | 0.46           | 1.78     | 0.82   | 1.10 | 0.44  | 0.71        | 0.35     | 0.74            | 1.06  | 1.33     | 1.54            | 1.63   | 1.98   | 0.81   | 0.30        | 0.63   | 0.76    |
| RNF217 | 1.38        | 1.60        | 2.18       | 0.72        | 0.51          | 0.23           | 2.19     | 0.58   | 0.79 | 1.29  | 0.43        | 0.20     | 0.48            | 0.99  | 1.30     | 0.59            | 0.50   | 3.88   | 0.70   | 0.85        | 0.13   | 2.72    |



**Supplementary Table S1c** Tissue distribution of transmembrane E3 ligases (mouse C3H2C3 type).

|        | Whole brain | Hypothalamus | Adrenal | Thymus | Sub-maxillary | Thyroid | Lung | Stomach | Liver | Pancreas | Coelenteron | Ileum | Proximal colon | Distal colon | Prostate | Cartilage | Kidney | Testis | Seminal vesicle | Heart | Spleen |
|--------|-------------|--------------|---------|--------|---------------|---------|------|---------|-------|----------|-------------|-------|----------------|--------------|----------|-----------|--------|--------|-----------------|-------|--------|
| RNF130 | 1.72        | 1.66         | 1.40    | 1.02   | 0.48          | 1.12    | 1.13 | 0.76    | 0.79  | 0.05     | 0.24        | 0.36  | 0.75           | 0.58         | 1.83     | 1.44      | 1.76   | 0.87   | 0.32            | 0.78  | 1.21   |
| RNF150 | 4.67        | 2.54         | 1.73    | 0.53   | 0.04          | 0.36    | 1.58 | 0.16    | 0.03  | 0.01     | 0.06        | 0.13  | 0.63           | 0.14         | 0.09     | 0.32      | 0.13   | 0.18   | 0.08            | 1.31  | 1.06   |
| RNF149 | 0.75        | 0.86         | 0.90    | 0.08   | 0.83          | 0.94    | 0.22 | 0.69    | 0.94  | 1.09     | 1.08        | 0.92  | 0.71           | 1.06         | 0.84     | 2.11      | 1.28   | 1.54   | 1.54            | 0.79  | 2.20   |
| RNF133 | 0.17        | 0.15         | 0.01    | 0.01   | 0.17          | 0.08    | 0.12 | 0.04    | 0.02  | 0.01     | 0.29        | 0.07  | 0.10           | 0.11         | 0.13     | 0.02      | 0.03   | 25.05  | 0.03            | 0.01  | 0.02   |
| RNF128 | 0.27        | 0.59         | 0.76    | 0.16   | 0.60          | 0.71    | 0.13 | 1.67    | 0.93  | 0.02     | 3.71        | 3.93  | 1.83           | 0.88         | 0.62     | 0.03      | 2.36   | 0.19   | 0.73            | 1.17  | 0.02   |
| RNF122 | 0.90        | 1.01         | 1.24    | 1.34   | 0.95          | 0.65    | 2.64 | 0.41    | 0.08  | 0.06     | 0.57        | 0.72  | 0.48           | 0.32         | 0.34     | 0.75      | 0.94   | 0.29   | 0.31            | 0.97  | 3.56   |
| RNF24  | 1.78        | 1.83         | 0.52    | 0.26   | 0.10          | 0.55    | 0.33 | 0.11    | 0.16  | 0.01     | 0.22        | 0.39  | 0.25           | 0.31         | 0.08     | 0.24      | 3.12   | 9.68   | 0.08            | 0.19  | 0.12   |
| RNF13  | 1.37        | 1.44         | 1.34    | 0.86   | 0.56          | 0.85    | 1.46 | 0.58    | 1.35  | 0.06     | 0.73        | 0.55  | 0.53           | 0.33         | 0.70     | 0.43      | 2.78   | 0.84   | 0.29            | 1.30  | 0.81   |
| RNF167 | 1.03        | 1.17         | 1.32    | 2.77   | 0.46          | 0.71    | 1.28 | 0.47    | 0.47  | 0.05     | 1.14        | 0.81  | 0.72           | 0.36         | 0.46     | 1.17      | 1.38   | 3.49   | 0.48            | 0.70  | 1.42   |
| ZNRF4  | 0.00        | 0.00         | 0.00    | 0.00   | 0.00          | 0.01    | 0.00 | 0.00    | 0.00  | 0.00     | 0.25        | 0.02  | 0.00           | 0.00         | 0.02     | 0.00      | 0.00   | 30.68  | 0.00            | 0.00  | 0.00   |
| RNF43  | 0.34        | 0.17         | 0.71    | 0.73   | 2.63          | 0.88    | 1.53 | 1.30    | 2.15  | 0.05     | 2.60        | 2.27  | 2.02           | 1.95         | 1.23     | 0.06      | 0.70   | 1.16   | 1.55            | 0.00  | 0.20   |
| ZNRF3  | 1.28        | 0.92         | 2.16    | 1.83   | 0.69          | 0.82    | 1.48 | 0.71    | 0.53  | 0.10     | 0.52        | 0.55  | 0.55           | 0.47         | 0.77     | 0.23      | 1.26   | 4.63   | 0.73            | 0.48  | 0.52   |
| SYVN1  | 1.00        | 1.18         | 1.34    | 1.07   | 0.84          | 0.37    | 0.80 | 0.56    | 0.83  | 0.15     | 0.92        | 1.16  | 0.84           | 0.96         | 1.37     | 0.82      | 0.64   | 2.80   | 0.92            | 0.45  | 1.82   |
| AMFR   | 1.10        | 1.12         | 1.75    | 0.60   | 0.51          | 0.64    | 0.90 | 0.45    | 1.82  | 0.05     | 0.54        | 0.70  | 0.63           | 0.47         | 0.58     | 0.58      | 1.81   | 3.30   | 0.30            | 1.09  | 0.60   |
| RNF121 | 1.47        | 2.01         | 1.00    | 1.00   | 0.59          | 0.41    | 0.85 | 0.76    | 0.55  | 0.03     | 2.09        | 0.94  | 1.04           | 0.82         | 0.55     | 0.38      | 1.06   | 3.36   | 0.33            | 0.65  | 0.62   |
| RNF145 | 1.38        | 1.69         | 4.26    | 0.04   | 0.53          | 0.46    | 1.88 | 0.28    | 0.31  | 0.84     | 0.68        | 0.69  | 0.66           | 2.04         | 0.37     | 1.06      | 1.65   | 0.21   | 1.93            | 0.23  | 0.25   |
| RNF139 | 0.45        | 0.49         | 0.48    | 0.77   | 0.17          | 0.29    | 0.60 | 0.30    | 0.39  | 0.04     | 0.59        | 0.34  | 0.36           | 0.24         | 0.34     | 0.78      | 0.74   | 14.06  | 0.17            | 0.63  | 0.63   |
| RNF103 | 1.25        | 1.33         | 0.90    | 0.64   | 0.91          | 0.44    | 0.80 | 0.65    | 1.48  | 0.04     | 0.97        | 1.44  | 1.70           | 1.16         | 1.54     | 0.31      | 1.15   | 0.80   | 0.55            | 0.56  | 0.43   |

e

**Supplementary Table S1d** Tissue distribution of transmembrane E3 ligases (mouse C3HC4 type).

|        | Whole brain | Hypothalamus | Adrenal | Thymus | Sub-maxillary | Thyroid | Lung | Stomach | Liver | Pancreas | Coelenteron | Ileum | Proximal colon | Distal colon | Prostate | Cartilage | Kidney | Testis | Seminal vesicle | Heart | Spleen |
|--------|-------------|--------------|---------|--------|---------------|---------|------|---------|-------|----------|-------------|-------|----------------|--------------|----------|-----------|--------|--------|-----------------|-------|--------|
| RNF19A | 0.43        | 0.41         | 0.48    | 0.72   | 0.09          | 0.30    | 0.78 | 0.20    | 0.26  | 0.01     | 0.58        | 0.49  | 0.27           | 0.17         | 0.15     | 0.47      | 0.62   | 17.33  | 0.11            | 0.30  | 0.41   |
| RNF19B | 0.36        | 0.37         | 0.26    | 0.38   | 0.16          | 0.11    | 0.45 | 0.18    | 0.27  | 0.02     | 0.67        | 0.69  | 0.45           | 0.37         | 0.14     | 0.33      | 0.30   | 16.40  | 0.07            | 0.20  | 0.63   |
| RNF5   | 1.08        | 1.59         | 1.22    | 1.07   | 0.76          | 1.07    | 0.59 | 0.48    | 1.25  | 0.12     | 1.37        | 1.44  | 1.05           | 0.89         | 0.59     | 0.56      | 2.27   | 1.28   | 0.51            | 0.66  | 0.59   |
| RNF185 | 0.88        | 1.13         | 1.26    | 0.69   | 0.77          | 0.73    | 0.98 | 0.62    | 0.70  | 0.09     | 0.97        | 1.05  | 0.73           | 0.55         | 1.16     | 0.41      | 1.85   | 5.22   | 0.82            | 0.67  | 0.64   |
| RNF170 | 1.67        | 2.25         | 0.84    | 1.12   | 0.71          | 0.47    | 0.79 | 0.42    | 0.64  | 0.07     | 1.07        | 0.75  | 0.74           | 0.48         | 0.72     | 0.46      | 0.96   | 2.93   | 0.38            | 0.83  | 0.68   |
| RNF186 | 0.00        | 0.01         | 0.00    | 0.06   | 0.00          | 0.05    | 1.59 | 0.44    | 0.45  | 0.02     | 3.84        | 2.66  | 8.66           | 4.33         | 2.45     | 0.04      | 2.20   | 0.01   | 0.03            | 0.01  | 0.08   |
| RNF152 | 1.06        | 1.51         | 0.20    | 0.07   | 0.61          | 0.56    | 0.14 | 1.28    | 0.83  | 0.01     | 1.13        | 5.43  | 1.01           | 0.48         | 0.15     | 0.08      | 3.83   | 0.26   | 0.04            | 0.26  | 0.12   |
| RNF183 | 0.03        | 0.22         | 0.44    | 0.81   | 0.00          | 2.44    | 0.13 | 0.02    | 0.00  | 0.01     | 0.07        | 0.05  | 0.07           | 0.30         | 0.01     | 0.00      | 21.98  | 1.63   | 0.01            | 0.03  | 0.01   |
| RNF182 | 4.76        | 4.31         | 0.27    | 0.05   | 0.07          | 0.27    | 0.02 | 0.04    | 0.01  | 0.03     | 0.02        | 0.03  | 0.03           | 0.02         | 0.31     | 0.31      | 0.13   | 1.96   | 0.13            | 0.04  | 0.07   |
| TRIM59 | 1.12        | 0.88         | 0.31    | 2.66   | 0.06          | 0.16    | 0.44 | 0.15    | 0.01  | 0.02     | 0.48        | 0.63  | 0.54           | 0.37         | 0.07     | 3.61      | 0.12   | 8.43   | 0.06            | 0.07  | 2.18   |
| TRIM13 | 0.88        | 1.13         | 0.62    | 0.66   | 0.21          | 0.25    | 0.75 | 0.64    | 0.07  | 0.05     | 0.36        | 0.21  | 0.27           | 0.11         | 0.37     | 0.31      | 1.29   | 12.41  | 0.38            | 0.60  | 0.18   |
| BFAR   | 1.00        | 1.34         | 1.18    | 1.42   | 0.46          | 0.57    | 0.94 | 0.57    | 1.09  | 0.05     | 0.79        | 0.92  | 1.36           | 0.80         | 0.50     | 0.53      | 1.21   | 1.70   | 0.43            | 1.65  | 0.97   |
| RNF180 | 2.61        | 3.12         | 0.40    | 1.16   | 0.06          | 0.27    | 0.63 | 0.12    | 0.06  | 0.01     | 0.19        | 1.71  | 0.37           | 0.40         | 1.43     | 0.50      | 0.94   | 2.76   | 1.58            | 0.12  | 0.68   |
| RNFT1  | 0.58        | 0.53         | 0.89    | 0.82   | 0.52          | 0.63    | 0.93 | 0.77    | 0.78  | 0.07     | 0.69        | 0.93  | 1.34           | 0.53         | 0.79     | 0.38      | 1.99   | 6.55   | 0.37            | 0.85  | 0.74   |
| RNF26  | 1.53        | 1.19         | 1.53    | 1.61   | 0.42          | 0.49    | 0.89 | 0.58    | 0.41  | 0.11     | 0.77        | 0.87  | 0.70           | 0.52         | 0.44     | 2.07      | 1.46   | 3.74   | 0.33            | 0.31  | 0.91   |
| CGRRF1 | 0.88        | 1.29         | 1.27    | 0.36   | 0.46          | 0.57    | 1.54 | 0.51    | 1.14  | 0.08     | 0.67        | 0.66  | 0.62           | 0.47         | 1.23     | 0.52      | 1.89   | 7.29   | 0.41            | 0.86  | 0.43   |
| MUL1   | 0.92        | 1.22         | 0.64    | 0.53   | 0.35          | 0.36    | 0.53 | 0.56    | 0.71  | 0.06     | 1.18        | 0.72  | 1.04           | 0.62         | 0.41     | 0.23      | 1.14   | 6.95   | 0.23            | 1.51  | 0.30   |
| RNF217 | 1.79        | 1.94         | 1.82    | 0.39   | 0.30          | 0.79    | 1.58 | 1.24    | 1.58  | 0.11     | 0.30        | 0.45  | 0.48           | 0.18         | 0.80     | 0.30      | 1.24   | 1.39   | 0.68            | 0.97  | 0.25   |

**Supplementary Table S2** Primer sets used for the cloning of WT,  $\Delta$ R and CS constructs.

| gene   | primer  | WT                             | $\Delta$ R                       | CS                                            |
|--------|---------|--------------------------------|----------------------------------|-----------------------------------------------|
| RNFT1  | Forward | 5'-CACCATGCCGCTGTTCTTGCTGTC-3' | 5'-AGAAGTGTGATTTTCAGACCAT-3'     | 5'-GATATTTCTTCAATATCTCAAGCTGAATTTTCAGAAGCC-3' |
|        | Reverse | 5'-ATATATTTGAAGGTGTGATGAA-3'   | 5'-AATATCATCCACATCTGAACAC-3'     | 5'-GGCTTCTGAAATTCAGCTTGAGATATTGAAGAAATATC-3'  |
| RNF185 | Forward | 5'-CACCATGGCAAGCAAGGGGC-3'     | 5'-AAAGCTGGCATCAGCCGAGA-3'       | 5'-GGACAGCACTTTCGAGTCCAACATCTGCTTGG-3'        |
|        | Reverse | 5'-GGCAATCAGGAGCCAGAACA-3'     | 5'-CTCGAAAGTGCTGTCTGCC-3'        | 5'-CCAAGCAGATGTTGGACTCGAAAGTGCTGTCC-3'        |
| CGRRF1 | Forward | 5'-CACCATGGCTGCGGTGTTTCTGGT-3' | 5'-AGGCAGTTTGTTCAGGAATC-3'       | 5'-GCAAGGACTCTGTTGTTTCCCAGAATGGG-3'           |
|        | Reverse | 5'-AAGAGTCTTCGGTTTGTCTTTA-3'   | 5'-GTCCTTGCTGTTCTCTCCG-3'        | 5'-CCCATTCTGGGAAACAACAGAGTCCTTGC-3'           |
| RNF19B | Forward | 5'-CACCATGGGCTCCGAGAAGGACT-3'  | 5'-CACCATGAAAGAGATCTCAGACTTGC-3' |                                               |
|        | Reverse | 5'-TACTCTGGCTTCTCCACCTT-3'     | 5'-TACTCTGGCTTCTCCACCTT-3'       |                                               |

**Supplementary Table S3a** Sets of primers and probes for real-time PCR (C3H2C3 type).

| Gene Name | AB Assay ID   | IDT Assay ID        |
|-----------|---------------|---------------------|
| RNF130    | Hs00218335_m1 | Mm.PT.58.9219868    |
| RNF150    | Hs00324941_m1 | Mm.PT.58.10273312   |
| RNF149    | Hs00411860_m1 | Mm.PT.58.11306683   |
| RNF133    | Hs00373669_s1 | Mm.PT.58.43776563.g |
| RNF128    | Hs00226053_m1 | Mm.PT.56a.8462982   |
| RNF122    | Hs00227141_m1 | Mm.PT.58.8505793    |
| RNF24     | Hs00200579_m1 | Mm.PT.58.9635653    |
| RNF13     | Hs00961507_m1 | Mm.PT.58.11306683   |
| RNF167    | Hs00248913_m1 | Mm.PT.58.32670381   |
| ZNRF4     | Hs00741333_s1 | Mm.PT.58.32478833.g |
| RNF43     | Hs00214886_m1 | Mm.PT.56a.31556976  |
| ZNRF3     | Hs00293334_m1 | Mm.PT.56a.5645486   |
| SYVN1     | Hs00381211_m1 | Mm.PT.58.14132695   |
| AMFR      | Hs01031688_m1 | Mm.PT.58.9856954    |
| RNF175    | Hs00922707_m1 |                     |
| RNF121    | Hs00217843_m1 | Mm.PT.58.6378114    |
| RNF145    | Hs01099640_m1 | Mm.PT.58.10110397   |
| RNF139    | Hs00183680_m1 | Mm.PT.58.45812642   |
| RNF103    | Hs01084476_m1 | Mm.PT.58.9763784    |

**Supplementary Table S3b** Sets of primers and probes for real-time PCR (C3HC4 type).

| Gene Name | AB Assay ID   | IDT Assay ID         |
|-----------|---------------|----------------------|
| RNF19A    | Hs00209954_m1 | Mm.PT.58.28600163    |
| RNF19B    | Hs00415359_m1 | Mm.PT.58.28736280    |
| RNF5      | Hs00359834_g1 | Mm.PT.58.14209781    |
| RNF185    | Hs01565008_m1 | Mm.PT.56a.11642500   |
| RNF170    | Hs00229577_m1 | Mm.PT.56a.13272002   |
| RNF186    | Hs00535508_s1 | Mm.PT.56a.29338718.g |
| RNF152    | Hs00741870_g1 | Mm.PT.58.29277956.g  |
| RNF183    | Hs00760214_s1 | Mm.PT.58.42013627    |
| RNF182    | Hs00381370_m1 | Mm.PT.58.30902864.g  |
| TRIM59    | Hs00416416_m1 | Mm.PT.58.30417218    |
| TRIM13    | Hs00362364_m1 | Mm.PT.56a.9751937    |
| BFAR      | Hs00275423_m1 | Mm.PT.56a.28494992   |
| RNF180    | Hs00400379_m1 | Mm.PT.58.45835696    |
| RNFT1     | Hs00211612_m1 | Mm.PT.58.6836835     |
| RNF26     | Hs00259249_s1 | Mm.PT.58.5764306.g   |
| CGRRF1    | Hs00198091_m1 | Mm.PT.58.5664724     |
| MUL1      | Hs00226069_m1 | Mm.PT.58.11670267    |
| RNF217    | Hs00332105_m1 | Mm.PT.56a.33323466   |
